# Supplementary material for: Unusual dimeric tetrahydroxanthone derivatives from Aspergillus lentulus and the determination of their axial chiralities
Source: PubMed Central journal article supplement (PMC5150534; doi:10.1038/srep38958), 2016-12-12
Supplement: srep38958-s1.pdf [file srep38958-s1.pdf]

## Supporting Information

### Unusual dimeric tetrahydroxanthone derivatives from *Aspergillus lentulus* and the determination of their axial chiralities

Tian-Xiao Li,<sup>+</sup> Ming-Hua Yang,<sup>+</sup> Ying Wang, Xiao-Bing Wang, Jun Luo, Jian-Guang Luo & Ling-Yi Kong\*

State Key Laboratory of Natural Medicines, Department of Natural Medicinal Chemistry, China Pharmaceutical University, 24 Tong Jia Xiang, Nanjing 210009, People's Republic of China

\*Corresponding author.

Tel/Fax: +86-25-8327-1405.

E-mail address: [cpu\\_lykong@126.com](mailto:cpu_lykong@126.com).

<sup>+</sup>These authors contributed equally to this work.

## Content

|                                                                                                                                   |    |
|-----------------------------------------------------------------------------------------------------------------------------------|----|
| <b>Table S1.</b> $^{13}\text{C}$ NMR (125 MHz) spectroscopic data for <b>2–9</b>                                                  | 1  |
| <b>Table S2.</b> $^1\text{H}$ NMR (500 MHz, $J$ in Hz) spectroscopic data for <b>2–9</b>                                          | 2  |
| <b>Table S3.</b> ECD CEs of reported dimeric tetrahydroxanthone analogues                                                         | 3  |
| <b>Figure S1.</b> $\text{Rh}_2(\text{OCOCF}_3)_4$ -induced ECD spectrum of lentulin C ( <b>4</b> ) (in $\text{CH}_2\text{Cl}_2$ ) | 4  |
| <b>Figure S2.</b> $^1\text{H}$ NMR spectrum (500 MHz, $\text{CDCl}_3$ ) of neosartorin ( <b>1</b> )                               | 5  |
| <b>Figure S3.</b> $^{13}\text{C}$ NMR spectrum (125 MHz, $\text{CDCl}_3$ ) of neosartorin ( <b>1</b> )                            | 5  |
| <b>Figure S4.</b> ROESY spectrum ( $\text{CDCl}_3$ ) of neosartorin ( <b>1</b> )                                                  | 6  |
| <b>Figure S5.</b> UV spectrum (MeOH) of neosartorin ( <b>1</b> )                                                                  | 6  |
| <b>Figure S6.</b> HRESIMS spectrum of lentulin A ( <b>2</b> )                                                                     | 7  |
| <b>Figure S7.</b> $^1\text{H}$ NMR spectrum (500 MHz, $\text{CDCl}_3$ ) of lentulin A ( <b>2</b> )                                | 7  |
| <b>Figure S8.</b> $^{13}\text{C}$ NMR spectrum (125 MHz, $\text{CDCl}_3$ ) of lentulin A ( <b>2</b> )                             | 8  |
| <b>Figure S9.</b> HSQC spectrum ( $\text{CDCl}_3$ ) of lentulin A ( <b>2</b> )                                                    | 8  |
| <b>Figure S10.</b> HMBC spectrum ( $\text{CDCl}_3$ ) of lentulin A ( <b>2</b> )                                                   | 9  |
| <b>Figure S11.</b> ROESY spectrum ( $\text{CDCl}_3$ ) of lentulin A ( <b>2</b> )                                                  | 9  |
| <b>Figure S12.</b> UV spectrum (MeOH) of lentulin A ( <b>2</b> )                                                                  | 10 |
| <b>Figure S13.</b> HRESIMS spectrum of lentulin B ( <b>3</b> )                                                                    | 10 |
| <b>Figure S14.</b> $^1\text{H}$ NMR spectrum (500 MHz, $\text{CDCl}_3$ ) of lentulin B ( <b>3</b> )                               | 11 |
| <b>Figure S15.</b> $^{13}\text{C}$ NMR spectrum (125 MHz, $\text{CDCl}_3$ ) of lentulin B ( <b>3</b> )                            | 11 |
| <b>Figure S16.</b> HSQC spectrum ( $\text{CDCl}_3$ ) of lentulin B ( <b>3</b> )                                                   | 12 |
| <b>Figure S17.</b> HMBC spectrum ( $\text{CDCl}_3$ ) of lentulin B ( <b>3</b> )                                                   | 12 |

|                                                                                                 |    |
|-------------------------------------------------------------------------------------------------|----|
| <b>Figure S18.</b> ROESY spectrum (CDCl <sub>3</sub> ) of lentulin B (3)                        | 13 |
| <b>Figure S19.</b> UV spectrum (MeOH) of lentulin B (3)                                         | 13 |
| <b>Figure S20.</b> HRESIMS spectrum of lentulin C (4)                                           | 14 |
| <b>Figure S21.</b> <sup>1</sup> H NMR spectrum (500 MHz, CDCl <sub>3</sub> ) of lentulin C (4)  | 14 |
| <b>Figure S22.</b> <sup>13</sup> C NMR spectrum (125 MHz, CDCl <sub>3</sub> ) of lentulin C (4) | 15 |
| <b>Figure S23.</b> HSQC spectrum (CDCl <sub>3</sub> ) of lentulin C (4)                         | 15 |
| <b>Figure S24.</b> HMBC spectrum (CDCl <sub>3</sub> ) of lentulin C (4)                         | 16 |
| <b>Figure S25.</b> ROESY spectrum (CDCl <sub>3</sub> ) of lentulin C (4)                        | 16 |
| <b>Figure S26.</b> UV spectrum (MeOH) of lentulin C (4)                                         | 17 |
| <b>Figure S27.</b> HRESIMS spectrum of lentulin D (5)                                           | 17 |
| <b>Figure S28.</b> <sup>1</sup> H NMR spectrum (500 MHz, CDCl <sub>3</sub> ) of lentulin D (5)  | 18 |
| <b>Figure S29.</b> <sup>13</sup> C NMR spectrum (125 MHz, CDCl <sub>3</sub> ) of lentulin D (5) | 18 |
| <b>Figure S30.</b> HSQC spectrum (CDCl <sub>3</sub> ) of lentulin D (5)                         | 19 |
| <b>Figure S31.</b> HMBC spectrum (CDCl <sub>3</sub> ) of lentulin D (5)                         | 19 |
| <b>Figure S32.</b> ROESY spectrum (CDCl <sub>3</sub> ) of lentulin D (5)                        | 20 |
| <b>Figure S33.</b> UV spectrum (MeOH) of lentulin D (5)                                         | 20 |
| <b>Figure S34.</b> HRESIMS spectrum of lentulin E (6)                                           | 21 |
| <b>Figure S35.</b> <sup>1</sup> H NMR spectrum (500 MHz, CDCl <sub>3</sub> ) of lentulin E (6)  | 21 |
| <b>Figure S36.</b> <sup>13</sup> C NMR spectrum (125 MHz, CDCl <sub>3</sub> ) of lentulin E (6) | 22 |
| <b>Figure S37.</b> HSQC spectrum (CDCl <sub>3</sub> ) of lentulin E (6)                         | 22 |
| <b>Figure S38.</b> HMBC spectrum (CDCl <sub>3</sub> ) of lentulin E (6)                         | 23 |
| <b>Figure S39.</b> ROESY spectrum (CDCl <sub>3</sub> ) of lentulin E (6)                        | 23 |

|                                                                                                                             |    |
|-----------------------------------------------------------------------------------------------------------------------------|----|
| <b>Figure S40.</b> UV spectrum (MeOH) of lentulin E ( <b>6</b> )                                                            | 24 |
| <b>Figure S41.</b> HRESIMS spectrum of lentulin F ( <b>7</b> )                                                              | 24 |
| <b>Figure S42.</b> <sup>1</sup> H NMR spectrum (500 MHz, Acetone- <i>d</i> <sub>6</sub> ) of lentulin F ( <b>7</b> )        | 25 |
| <b>Figure S43.</b> <sup>13</sup> C NMR spectrum (125 MHz, Acetone- <i>d</i> <sub>6</sub> ) of lentulin F ( <b>7</b> )       | 25 |
| <b>Figure S44.</b> HSQC spectrum (Acetone- <i>d</i> <sub>6</sub> ) of lentulin F ( <b>7</b> )                               | 26 |
| <b>Figure S45.</b> HMBC spectrum (Acetone- <i>d</i> <sub>6</sub> ) of lentulin F ( <b>7</b> )                               | 26 |
| <b>Figure S46.</b> ROESY spectrum (Acetone- <i>d</i> <sub>6</sub> ) of lentulin F ( <b>7</b> )                              | 27 |
| <b>Figure S47.</b> UV spectrum (MeOH) of lentulin F ( <b>7</b> )                                                            | 27 |
| <b>Figure S48.</b> HRESIMS spectrum of lentulin G ( <b>8</b> )                                                              | 28 |
| <b>Figure S49.</b> <sup>1</sup> H NMR spectrum (500 MHz, CDCl <sub>3</sub> ) of lentulin G ( <b>8</b> )                     | 28 |
| <b>Figure S50.</b> <sup>13</sup> C NMR spectrum (125 MHz, CDCl <sub>3</sub> ) of lentulin G ( <b>8</b> )                    | 29 |
| <b>Figure S51.</b> HSQC spectrum (CDCl <sub>3</sub> ) of lentulin G ( <b>8</b> )                                            | 29 |
| <b>Figure S52.</b> HMBC spectrum (CDCl <sub>3</sub> ) of lentulin G ( <b>8</b> )                                            | 30 |
| <b>Figure S53.</b> ROESY spectrum (CDCl <sub>3</sub> ) of lentulin G ( <b>8</b> )                                           | 30 |
| <b>Figure S54.</b> UV spectrum (MeOH) of lentulin G ( <b>8</b> )                                                            | 31 |
| <b>Figure S55.</b> <sup>1</sup> H NMR spectrum (500 MHz, CDCl <sub>3</sub> ) of lentulin G ( <i>R</i> )-MPA ester <b>8a</b> | 31 |
| <b>Figure S56.</b> <sup>1</sup> H NMR spectrum (500 MHz, CDCl <sub>3</sub> ) of lentulin G ( <i>S</i> )-MPA ester <b>8b</b> | 32 |
| <b>Figure S57.</b> HRESIMS spectrum of lentulin H ( <b>9</b> )                                                              | 32 |

|                                                                                                                         |    |
|-------------------------------------------------------------------------------------------------------------------------|----|
| <b>Figure S58.</b> $^1\text{H}$ NMR spectrum (500 MHz, $\text{CDCl}_3$ ) of lentulin H ( <b>9</b> )                     | 33 |
| <b>Figure S59.</b> $^{13}\text{C}$ NMR spectrum (125 MHz, $\text{CDCl}_3$ ) of lentulin H ( <b>9</b> )                  | 33 |
| <b>Figure S60.</b> HSQC spectrum ( $\text{CDCl}_3$ ) of lentulin H ( <b>9</b> )                                         | 34 |
| <b>Figure S61.</b> HMBC spectrum ( $\text{CDCl}_3$ ) of lentulin H ( <b>9</b> )                                         | 34 |
| <b>Figure S62.</b> ROESY spectrum ( $\text{CDCl}_3$ ) of lentulin H ( <b>9</b> )                                        | 35 |
| <b>Figure S63.</b> UV spectrum (MeOH) of lentulin H ( <b>9</b> )                                                        | 35 |
| <b>Figure S64.</b> $^1\text{H}$ NMR spectrum (500 MHz, $\text{CDCl}_3$ ) of lentulin H ( <i>R</i> )-MPA ester <b>9a</b> | 36 |
| <b>Figure S65.</b> $^1\text{H}$ NMR spectrum (500 MHz, $\text{CDCl}_3$ ) of lentulin H ( <i>S</i> )-MPA ester <b>9b</b> | 36 |

**Table S1. <sup>13</sup>C NMR (125 MHz) Spectroscopic Data for 2–9**

| position          | 2 <sup>a</sup> | 3 <sup>a</sup> | 4 <sup>a</sup> | 5 <sup>a</sup> | 6 <sup>a</sup> | 7 <sup>b</sup> | 8 <sup>a</sup> | 9 <sup>a</sup> |
|-------------------|----------------|----------------|----------------|----------------|----------------|----------------|----------------|----------------|
| 1                 | 159.5          | 159.9          | 159.5          | 159.9          | 159.8          | 161.0          | 159.8          | 159.7          |
| 2                 | 118.6          | 118.1          | 118.1          | 118.0          | 117.8          | 118.8          | 118.0          | 117.4          |
| 3                 | 149.6          | 149.0          | 149.5          | 149.8          | 149.5          | 150.6          | 149.4          | 149.4          |
| 4                 | 108.7          | 109.1          | 108.8          | 108.7          | 108.7          | 109.9          | 108.5          | 108.5          |
| 4a                | 156.8          | 157.7          | 157.8          | 158.1          | 158.0          | 160.3          | 158.1          | 158.3          |
| 5                 | 67.1           | 71.9           | 72.0           | 81.0           | 79.7           | 74.9           | 74.0           | 74.7           |
| 6                 | 23.1           | 23.9           | 23.9           | 22.1           | 21.8           | 27.5           | 25.8           | 26.5           |
| 7                 | 24.4           | 27.5           | 27.7           | 27.7           | 27.6           | 31.5           | 30.6           | 30.5           |
| 8                 | 179.3          | 177.5          | 177.6          | 175.6          | 175.8          | 175.3          | 173.8          | 174.0          |
| 9                 | 100.2          | 101.2          | 101.9          | 39.4           | 40.3           | 40.0           | 38.3           | 40.3           |
| 9a                | 187.2          | 186.8          | 187.0          | 193.8          | 194.4          | 198.1          | 195.7          | 195.4          |
| 9b                | 104.9          | 104.6          | 104.9          | 105.6          | 105.4          | 106.9          | 105.5          | 105.5          |
| 10                | 83.9           | 84.4           | 84.6           | 84.2           | 84.7           | 88.7           | 86.5           | 86.1           |
| 11                | 171.3          | 170.2          | 170.9          | 169.2          | 169.2          | 171.8          | 170.3          | 170.3          |
| 12                | 53.4           | 53.1           | 53.1           | 53.7           | 53.6           | 54.0           | 53.5           | 53.2           |
| 13                |                |                |                |                |                |                | 51.8           | 51.8           |
| 3-CH <sub>3</sub> | 21.0           | 21.3           | 21.1           | 21.2           | 21.3           | 22.0           | 21.2           | 21.2           |
| 1'                | 161.7          | 161.8          | 161.6          | 161.8          | 161.8          | 162.9          | 161.8          | 161.8          |
| 2'                | 111.0          | 110.5          | 110.8          | 110.4          | 110.4          | 111.1          | 110.3          | 110.4          |
| 3'                | 140.1          | 139.8          | 140.2          | 139.7          | 139.5          | 141.8          | 139.9          | 139.8          |
| 4'                | 115.0          | 114.8          | 114.9          | 114.5          | 114.6          | 116.7          | 114.6          | 114.7          |
| 4'a               | 154.6          | 155.2          | 154.8          | 155.3          | 155.3          | 157.3          | 155.5          | 155.3          |
| 5'                | 70.7           | 70.0           | 70.3           | 69.6           | 69.9           | 71.2           | 69.6           | 70.0           |
| 6'                | 27.8           | 27.7           | 28.0           | 27.7           | 27.6           | 29.3           | 27.8           | 27.7           |
| 7'                | 33.2           | 33.0           | 33.0           | 32.9           | 33.0           | 34.2           | 32.9           | 32.9           |
| 8'                | 178.4          | 178.0          | 178.1          | 178.0          | 178.3          | 180.1          | 177.8          | 177.9          |
| 9'                | 101.1          | 100.3          | 100.9          | 100.3          | 100.5          | 101.9          | 100.3          | 100.3          |
| 9'a               | 187.8          | 187.7          | 188.0          | 187.7          | 187.7          | 189.3          | 187.8          | 187.8          |
| 9'b               | 107.2          | 106.8          | 107.2          | 106.8          | 106.9          | 108.2          | 106.9          | 106.9          |
| 10'               | 82.7           | 82.3           | 82.4           | 82.3           | 82.5           | 84.0           | 82.2           | 82.3           |
| 11'               | 170.5          | 170.5          | 170.2          | 170.5          | 170.7          | 171.6          | 170.6          | 170.5          |
| 12'               | 53.6           | 53.3           | 53.4           | 53.3           | 53.3           | 54.4           | 53.3           | 53.3           |
| 13'               | 17.2           | 17.1           | 17.2           | 17.1           | 17.0           | 17.8           | 17.1           | 17.0           |
| 14'               | 20.8           | 20.6           | 20.5           | 20.4           | 20.5           | 21.0           | 20.3           | 20.5           |
| 15'               | 169.4          | 169.6          | 168.9          | 169.0          | 169.3          | 170.5          | 169.1          | 170.1          |

<sup>a</sup>measured in CDCl<sub>3</sub>, <sup>b</sup>measured in Acetone-*d*<sub>6</sub>

**Table S2. <sup>1</sup>H NMR (500 MHz, *J* in Hz) Spectroscopic Data for 2–9**

| position          | 2 <sup>a</sup>      | 3 <sup>a</sup>        | 4 <sup>a</sup> | 5 <sup>a</sup>              | 6 <sup>a</sup>              | 7 <sup>b</sup>       | 8 <sup>a</sup>       | 9 <sup>a</sup> |
|-------------------|---------------------|-----------------------|----------------|-----------------------------|-----------------------------|----------------------|----------------------|----------------|
| 4                 | 6.47, s             | 6.53, s               | 6.49, s        | 6.52, s                     | 6.49, s                     | 6.44, s              | 6.48, s              | 6.52, s        |
| 5                 | 4.34, dd (4.0, 1.5) | 4.35, dd (12.4, 4.8)  | 4.34, br s     | 4.89, dd (7.6, 6.3)         | 4.81, dd (8.5, 4.4)         | 4.12, d (10.1)       | 4.09, d (10.4)       | 3.98, d (8.4)  |
| 6                 | 2.17, m             | 2.20, m               | 2.23, m        | 2.44, m                     | 2.53, m                     | 1.92, m              | 1.89, m              | 1.99, m        |
|                   | 1.98, m             | 2.11, m               | 2.09, m        | 2.44, m                     | 2.34, m                     | 1.73, m              | 1.75, m              | 1.95, m        |
| 7                 | 2.86, m             | 2.65, m               | 2.67, m        | 2.71, ddd (17.0, 9.9, 6.7)  | 2.82, ddd (17.8, 10.2, 6.8) | 2.61, dt (17.0, 7.0) | 2.61, dt (16.7, 6.9) | 2.59, m        |
|                   | 2.40, m             | 2.65, m               | 2.67, m        | 2.60, ddd (17.2, 10.0, 6.9) | 2.58, ddd (17.8, 10.2, 5.2) | 2.51, dt (16.6, 7.5) | 2.56, dt (16.7, 6.7) | 2.59, m        |
|                   |                     |                       |                | 3.21, d (16.9)              | 3.55, d (16.9)              | 3.28, d (17.0)       | 3.20, d (17.2)       | 3.41, d (16.8) |
|                   |                     |                       |                | 2.97, d (16.9)              | 3.07, d (16.9)              | 3.14, d (17.0)       | 3.15, d (17.2)       | 3.09, d (16.9) |
| 12                | 3.74, s             | 3.74, s               | 3.80, s        | 3.81, s                     | 3.76, s                     | 3.79, s              | 3.83, s              | 3.77, s        |
| 13                |                     |                       |                |                             |                             |                      | 3.70, s              | 3.71, s        |
| 1-OH              | 11.51, s            | 11.42, s              | 11.36, s       | 11.70, s                    | 11.66, s                    | 11.86, s             | 11.83, s             | 11.75, s       |
| 3-CH <sub>3</sub> | 1.97, s             | 2.04, s               | 1.97, s        | 2.08, s                     | 2.06, s                     | 2.10, s              | 2.08, s              | 2.05, s        |
| 8-OH              | 14.02, s            | 13.87, s              | 13.85, s       |                             |                             |                      |                      |                |
| 2'                | 6.62, d (8.5)       | 6.59, d (8.5)         | 6.62, br s     | 6.58, d (8.5)               | 6.59, d (8.5)               | 6.55, d (7.6)        | 6.58, d (8.5)        | 6.60, d (8.5)  |
| 3'                | 7.19, d (8.5)       | 7.15, d (8.5)         | 7.20, br s     | 7.13, d (8.5)               | 7.17, d (8.5)               | 7.21, d (7.7)        | 7.12, d (8.5)        | 7.17, d (8.4)  |
| 5'                | 5.39, d (1.3)       | 5.34, br s            | 5.34, s        | 5.25, br s                  | 5.29, d (1.2)               | 5.35, br s           | 5.28, d (1.1)        | 5.29, s        |
| 6'                | 2.15, m             | 2.24, m               | 2.15, m        | 2.26, m                     | 2.24, m                     | 2.36, m              | 2.29, m              | 2.24, m        |
| 7'                | 2.44, m             | 2.42, dd (18.8, 6.6)  | 2.40, m        | 2.38, m                     | 2.38, m                     | 2.42, m              | 2.37, m              | 2.38, m        |
|                   | 2.33, m             | 2.34, dd (18.8, 10.8) | 2.32, m        | 2.38, m                     | 2.38, m                     | 2.42, m              | 2.37, m              | 2.38, m        |
| 12'               | 3.63, s             | 3.64, s               | 3.59, s        | 3.64, s                     | 3.63, s                     | 3.66, s              | 3.65, s              | 3.64, s        |
| 13'               | 0.94, d (6.7)       | 0.93, d (6.6)         | 0.93, br s     | 0.91, d (6.5)               | 0.92, d (6.7)               | 0.93, d (3.2)        | 0.92, d (6.3)        | 0.93, d (6.2)  |
| 14'               | 2.07, s             | 2.04, s               | 2.01, s        | 1.95, s                     | 1.99, s                     | 1.93, s              | 1.95, s              | 1.98, s        |
| 1'-OH             | 11.40, s            | 11.42, s              | 11.36, s       | 11.38, s                    | 11.39, s                    |                      | 11.39, s             | 11.38, s       |
| 8'-OH             | 14.11, s            | 13.93, s              | 14.02, s       | 13.85, s                    | 13.93, s                    |                      | 13.82, s             | 13.88, s       |

<sup>a</sup>measured in CDCl<sub>3</sub>, <sup>b</sup>measured in Acetone-*d*<sub>6</sub>

**Table S3. ECD CEs of Reported Dimeric Tetrahydroxanthone Analogues**

| compound        | axial linkage | chromophore     | exciton chirality | 1st[ $\Delta\epsilon$ (nm)] | 2nd[ $\Delta\epsilon$ (nm)] | axial chirality | ref |
|-----------------|---------------|-----------------|-------------------|-----------------------------|-----------------------------|-----------------|-----|
| phomoxanthone A | 4,4'          | 1-arylpropenone | (-)               | -7.8(341)                   | +17.7(316)                  | aR              | 1   |
| gonytolide F    | 4,4'          | benzoyl         | (+)               | +3.1(235)                   | -19.0(215)                  | aS              | 2   |
| versixanthone A | 2,4'          | benzoyl         | (-)               | -128.1(253)                 | +135.5(219)                 | aR              | 3   |
| phomalevone A   | 2,2'          | benzoyl         | (+)               | +25.0(236)                  | -90.0(213)                  | aS              | 4   |
| phomalevone B   | 2,2'          | benzoyl         | (+)               | +12.0(242)                  | -41.0(216)                  | aS              | 4   |
| phomalevone C   | 2,2'          | benzoyl         | (+)               | +38.0(235)                  | -106.0(213)                 | aS              | 4   |

1. Rösberg, D. *et al.* Pro-apoptotic and immunostimulatory tetrahydroxanthone dimers from the endophytic fungus *Phomopsis longicolla*. *J Org Chem* **78**, 12409-12425 (2013).
2. Kikuchi, H., Isobe, M., Kurata, S., Katou, Y. & Oshima, Y. New dimeric and monomeric chromanones, gonytolides D–G, isolated from the fungus *Gonytrichum* sp.. *Tetrahedron* **68**, 6218-6223 (2012).
3. Wu, G.-W. *et al.* Versixanthonones A–F, cytotoxic xanthone–chromanone dimers from the marine-derived fungus *Aspergillus versicolor* HDN1009. *J Nat Prod* **78**, 2691-2698 (2015).
4. Shim, S. H., Baltrusaitis, J., Gloer, J. B. & Wicklow, D. T. Phomalevones A–C: dimeric and pseudodimeric polyketides from a fungicolous Hawaiian isolate of *Phoma* sp.(Cucurbitariaceae). *J Nat Prod* **74**, 395-401 (2011).



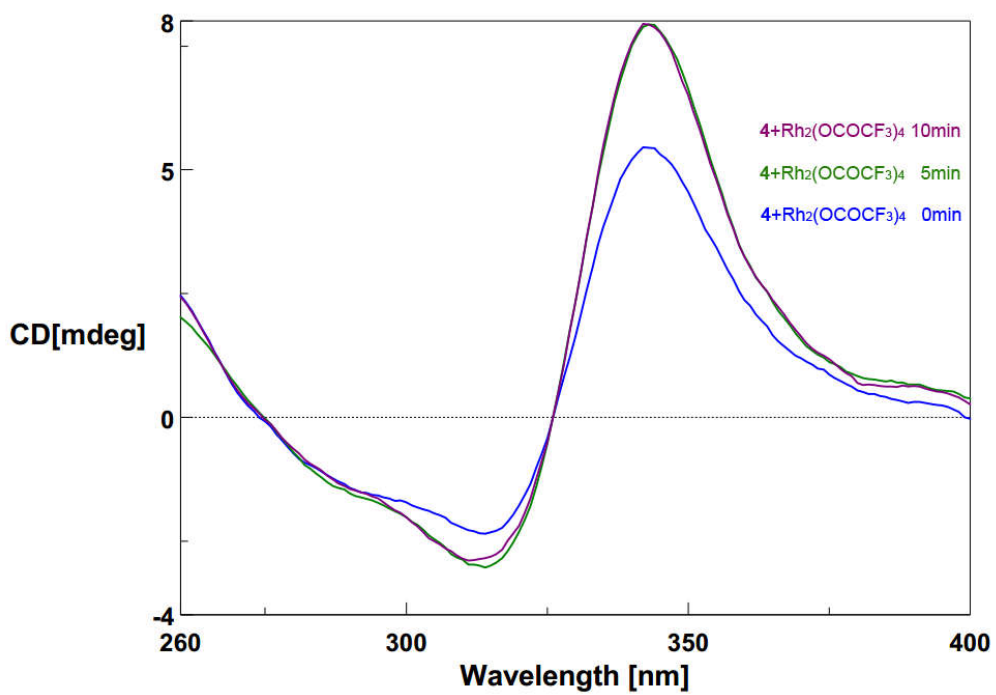

**Figure S1.**  $\text{Rh}_2(\text{OCOCF}_3)_4$ -induced ECD spectrum of lentulin C (**4**) (in  $\text{CH}_2\text{Cl}_2$ )

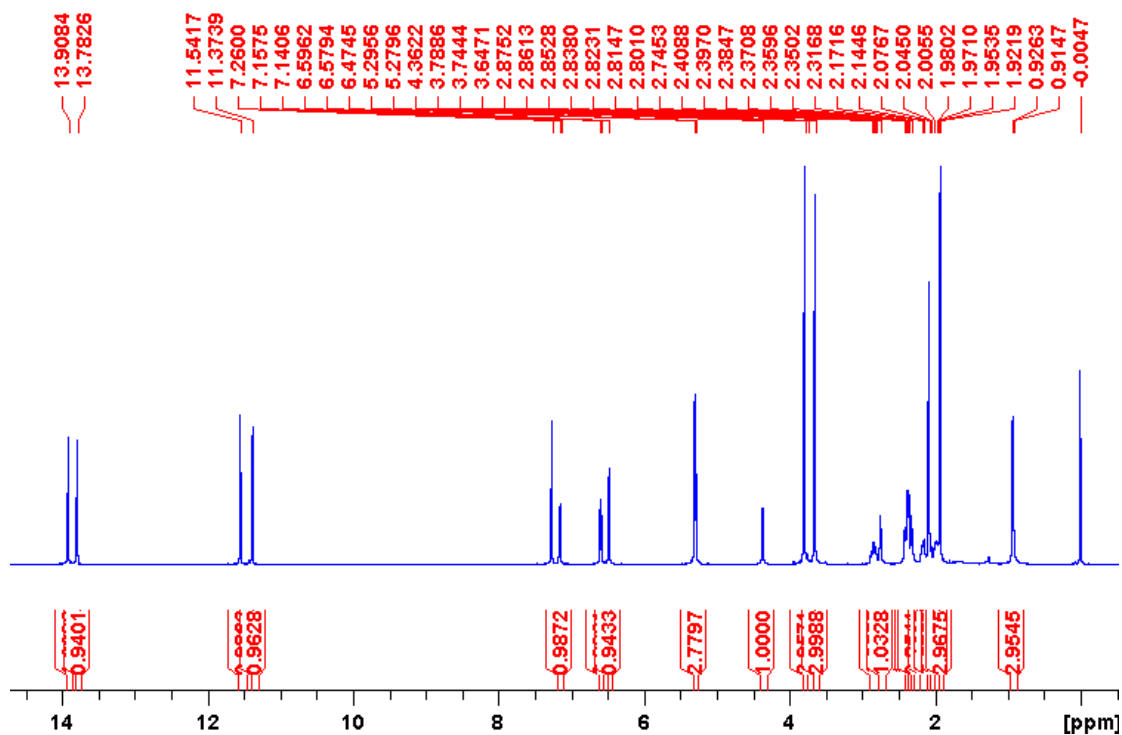

**Figure S2.** <sup>1</sup>H NMR spectrum (500 MHz, CDCl<sub>3</sub>) of neosartorin (1)

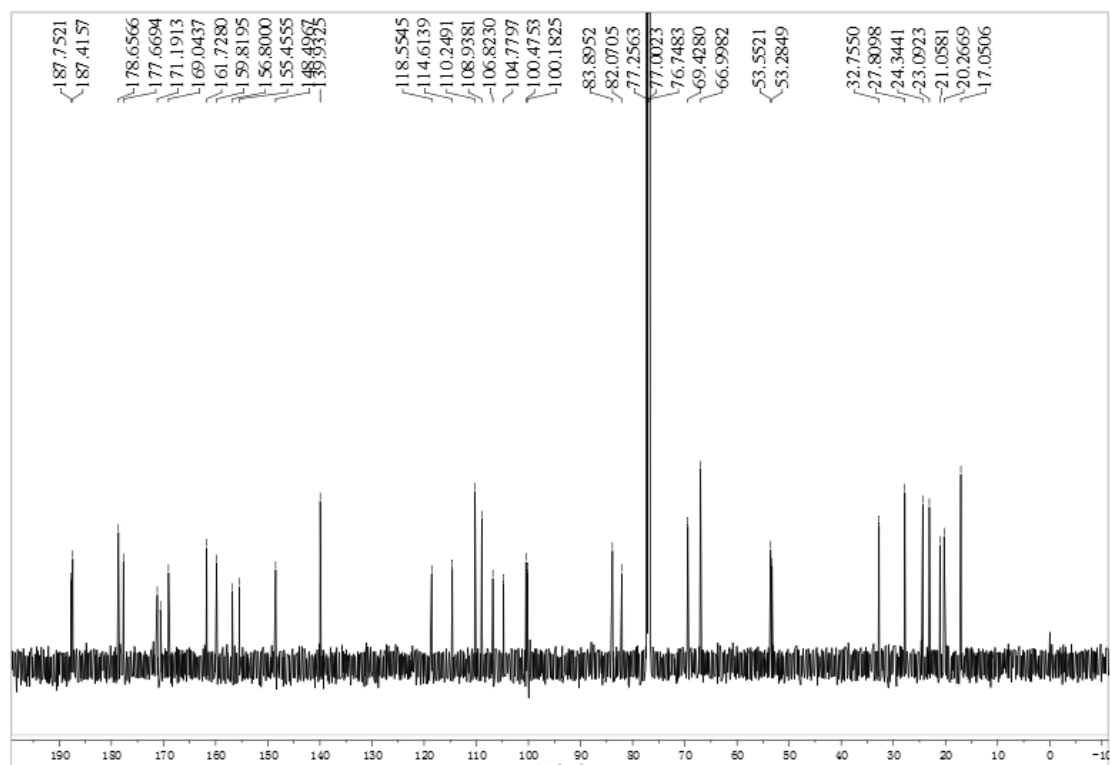

**Figure S3.** <sup>13</sup>C NMR spectrum (125 MHz, CDCl<sub>3</sub>) of neosartorin (1)

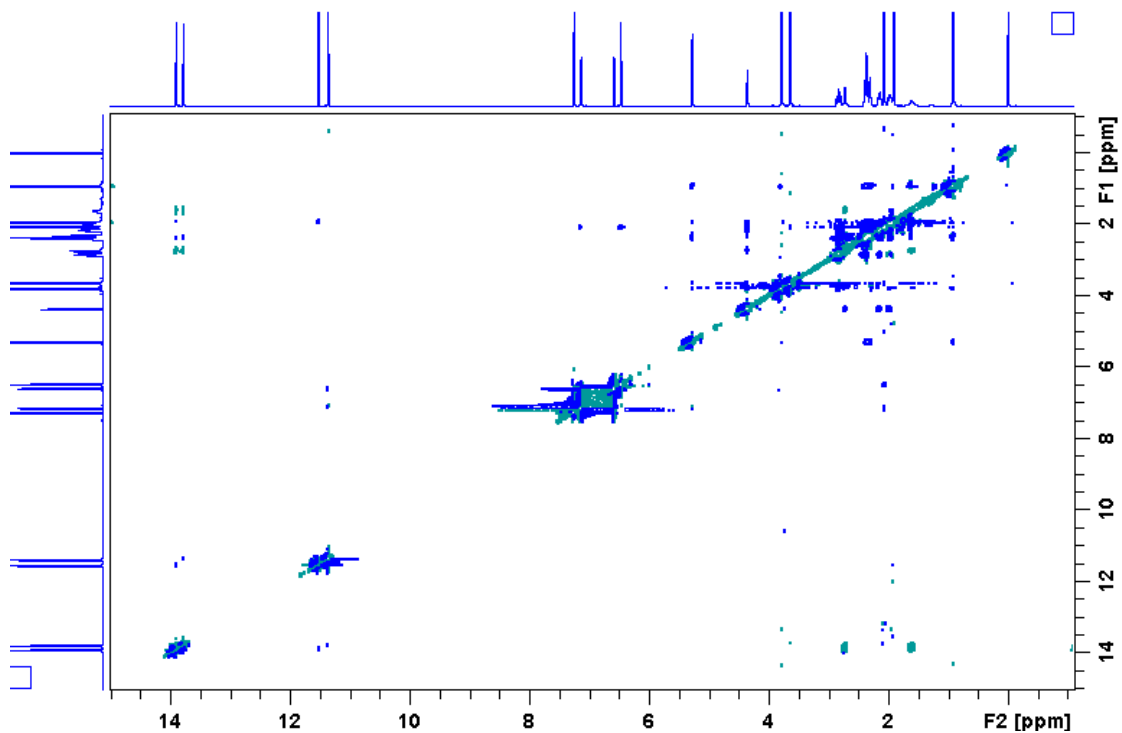

**Figure S4.** ROESY spectrum ( $\text{CDCl}_3$ ) of neosartorin (**1**)

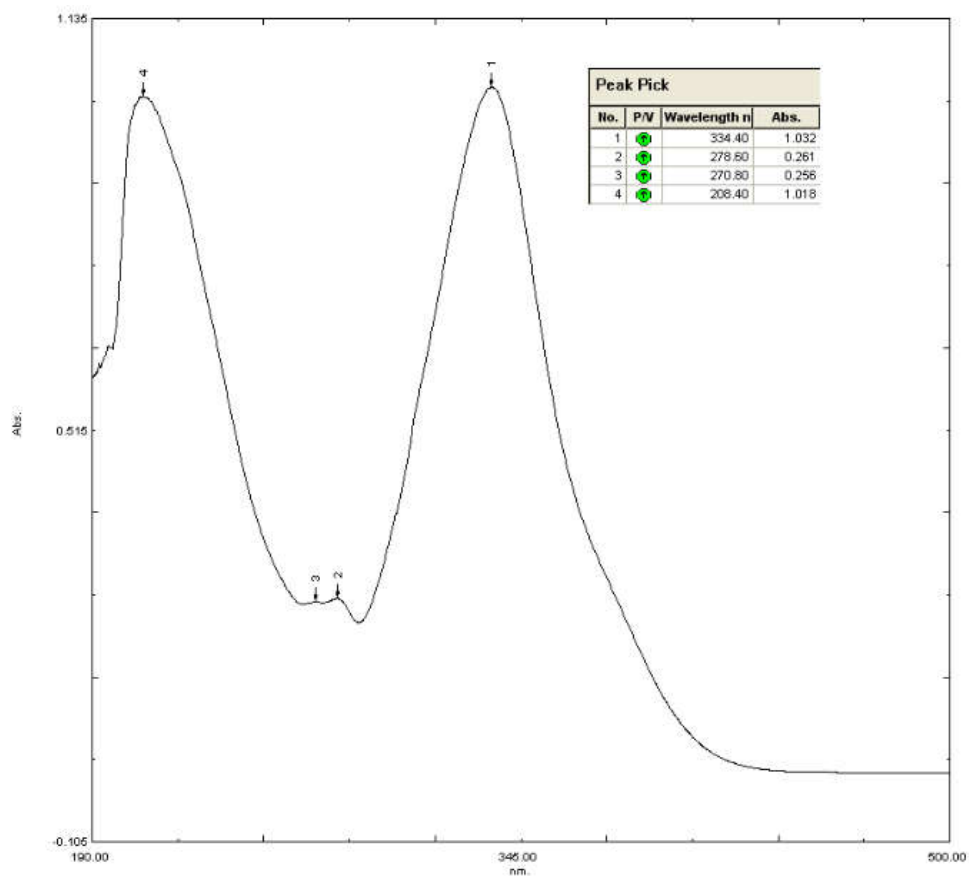

**Figure S5.** UV spectrum (MeOH) of neosartorin (**1**)

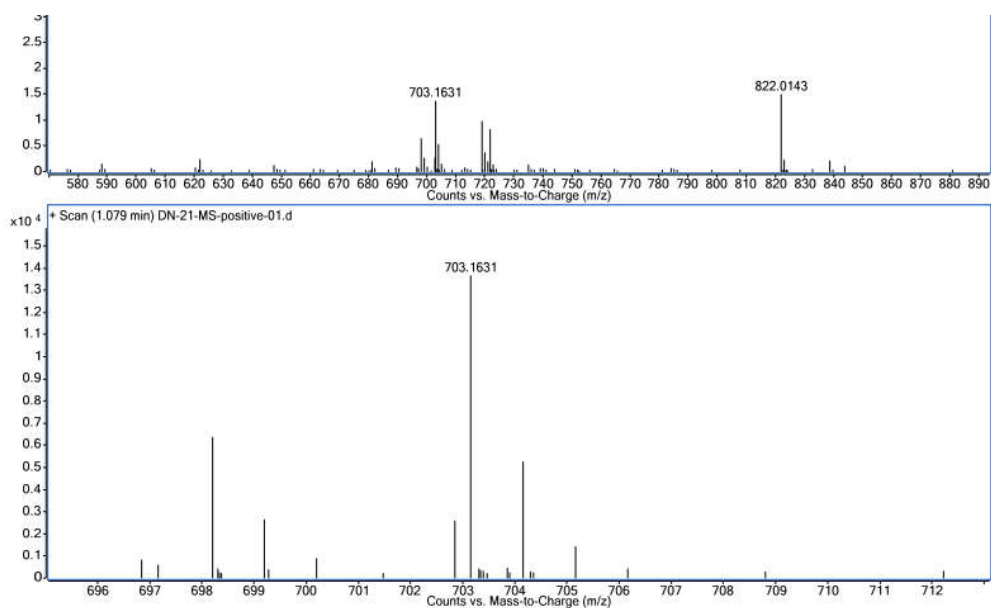

### Elemental Composition Calculator

|                                                   |                                                  |                     |                  |                 |                     |
|---------------------------------------------------|--------------------------------------------------|---------------------|------------------|-----------------|---------------------|
| <b>Target m/z:</b>                                | 703.1631                                         | <b>Result type:</b> | Positive ions    | <b>Species:</b> | [M+Na] <sup>+</sup> |
| <b>Elements:</b>                                  | C (0-80); H (0-120); O (0-30); N(0-10); Na (0-5) |                     |                  |                 |                     |
| <b>Ion Formula</b>                                | <b>Calculated m/z</b>                            |                     | <b>PPM Error</b> |                 |                     |
| C <sub>34</sub> H <sub>32</sub> NaO <sub>15</sub> | 703.1633                                         |                     | 0.29             |                 |                     |

Figure S6. HRESIMS spectrum of lentulin A (2)

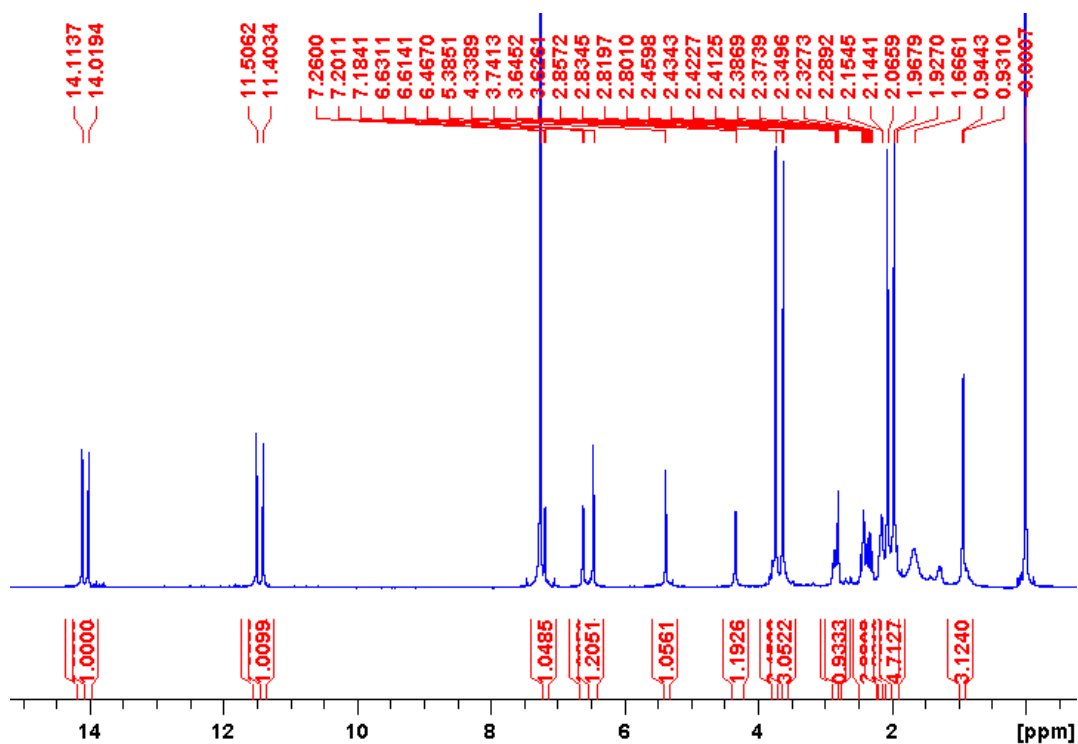

Figure S7. <sup>1</sup>H NMR spectrum (500 MHz, CDCl<sub>3</sub>) of lentulin A (2)

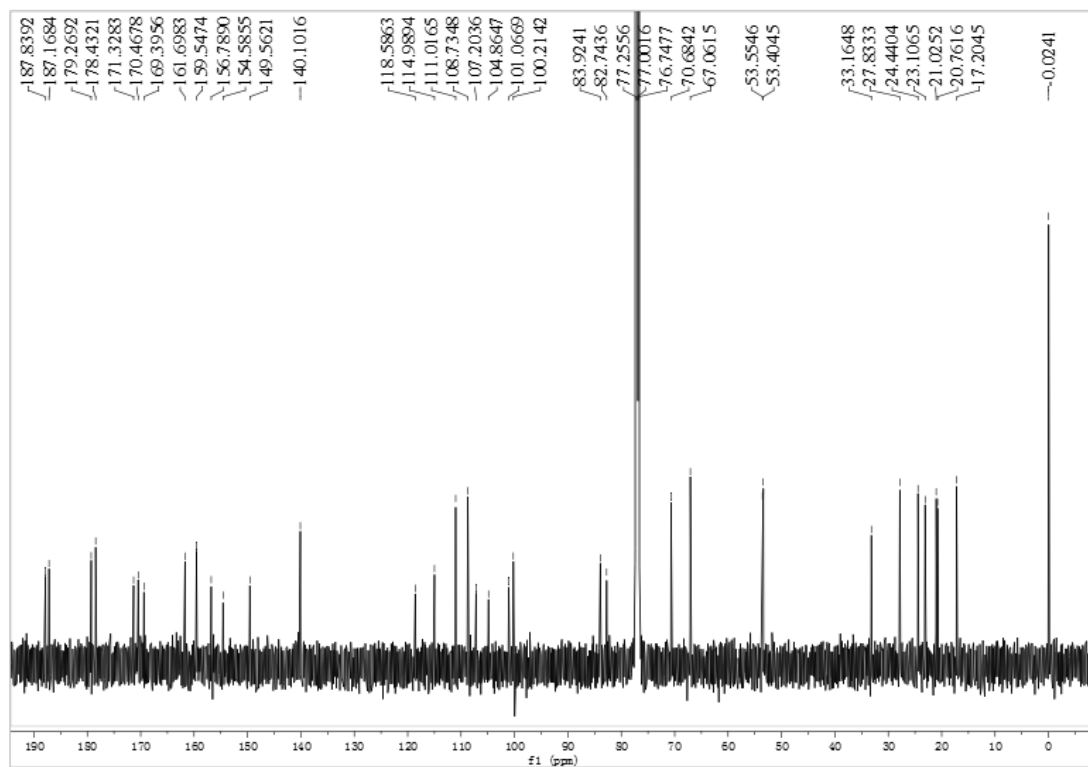

**Figure S8.**  $^{13}\text{C}$  NMR spectrum (125 MHz,  $\text{CDCl}_3$ ) of lentulin A (**2**)

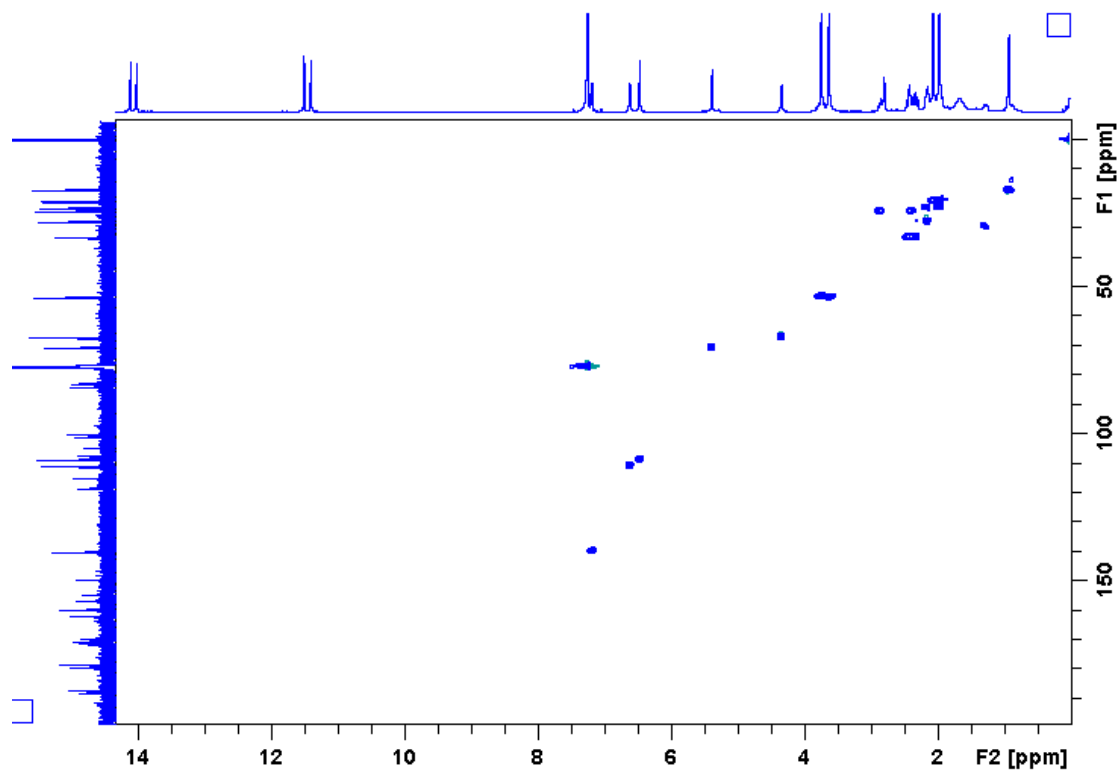

**Figure S9.** HSQC spectrum ( $\text{CDCl}_3$ ) of lentulin A (**2**)

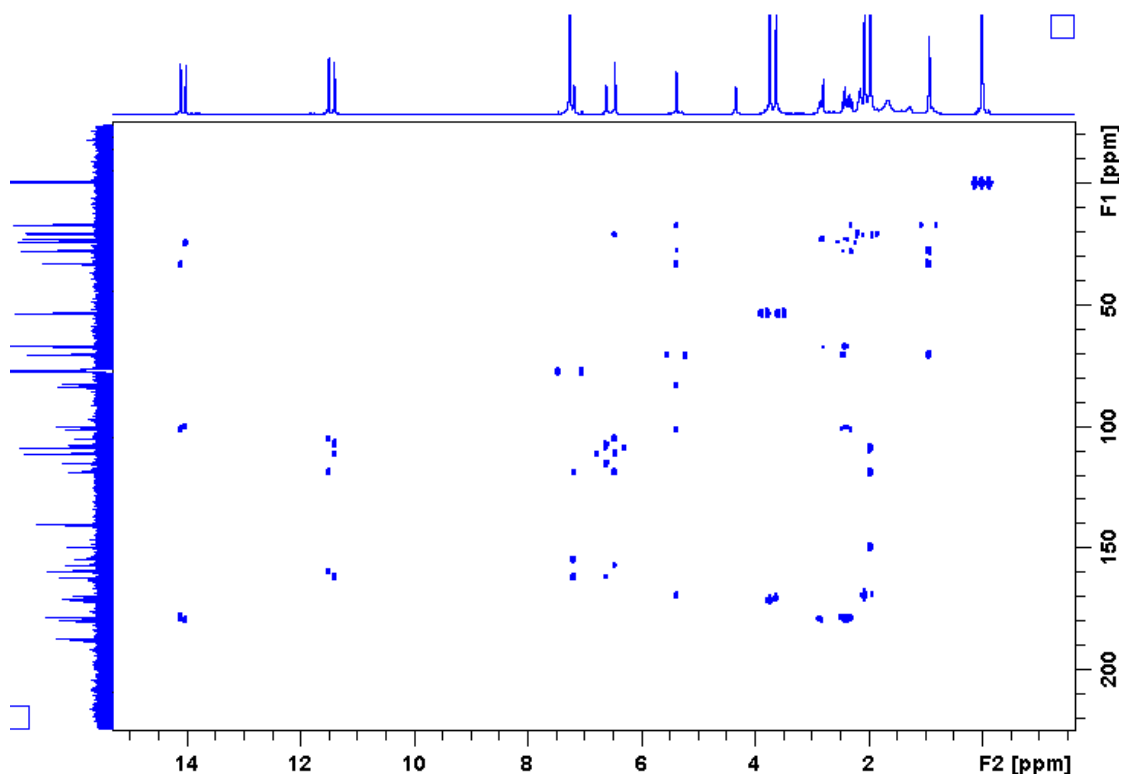

**Figure S10.** HMBC spectrum (CDCl<sub>3</sub>) of lentulin A (2)

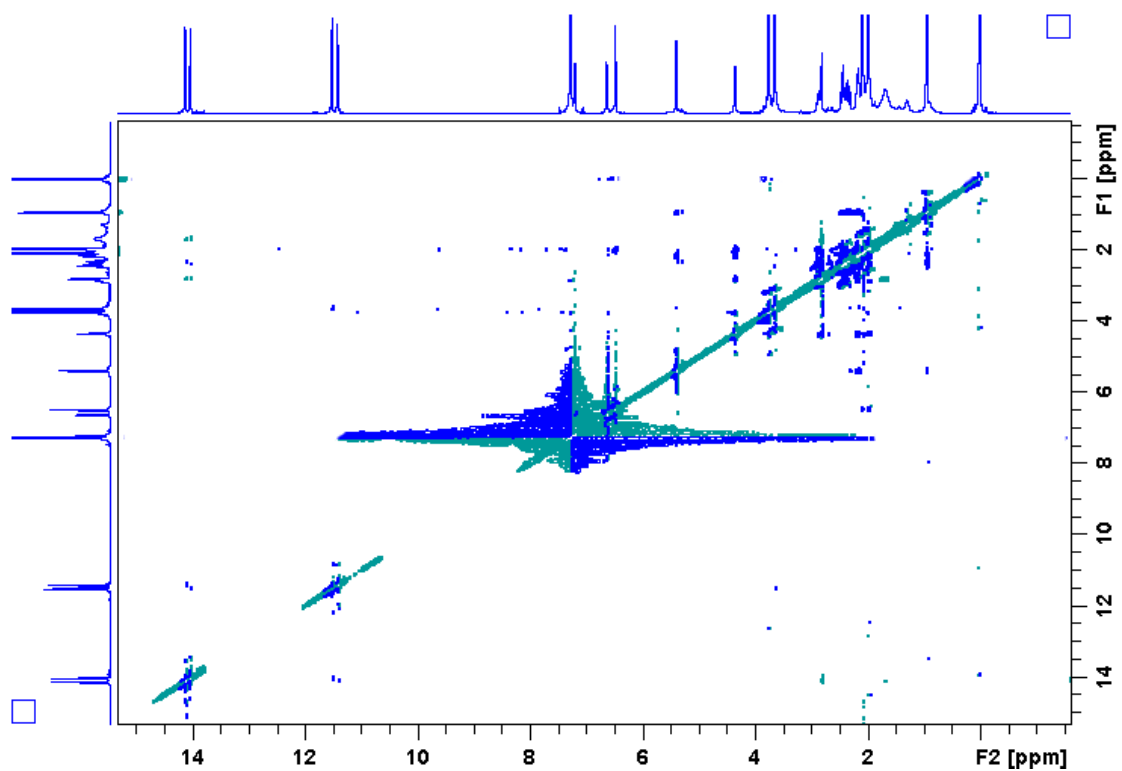

**Figure S11.** ROESY spectrum (CDCl<sub>3</sub>) of lentulin A (2)

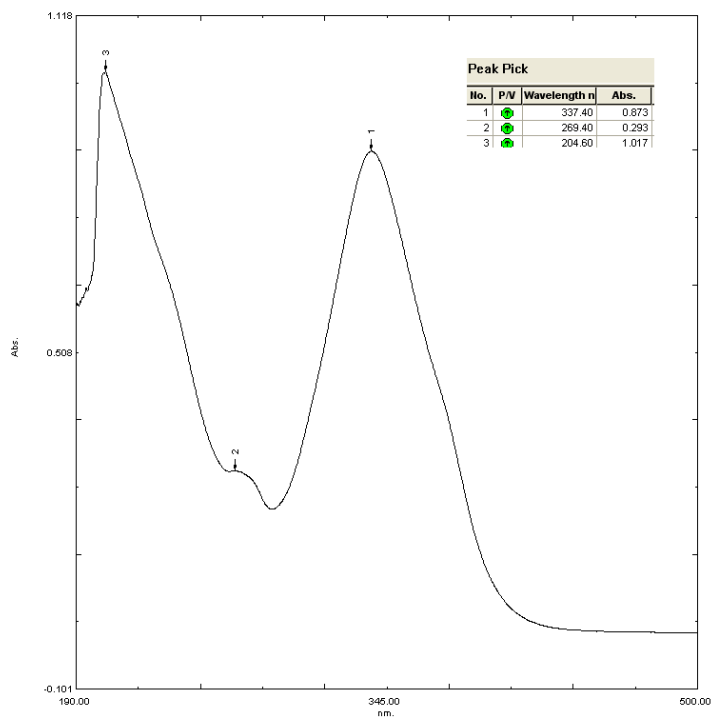

**Figure S12.** UV spectrum (MeOH) of lentulin A (2)

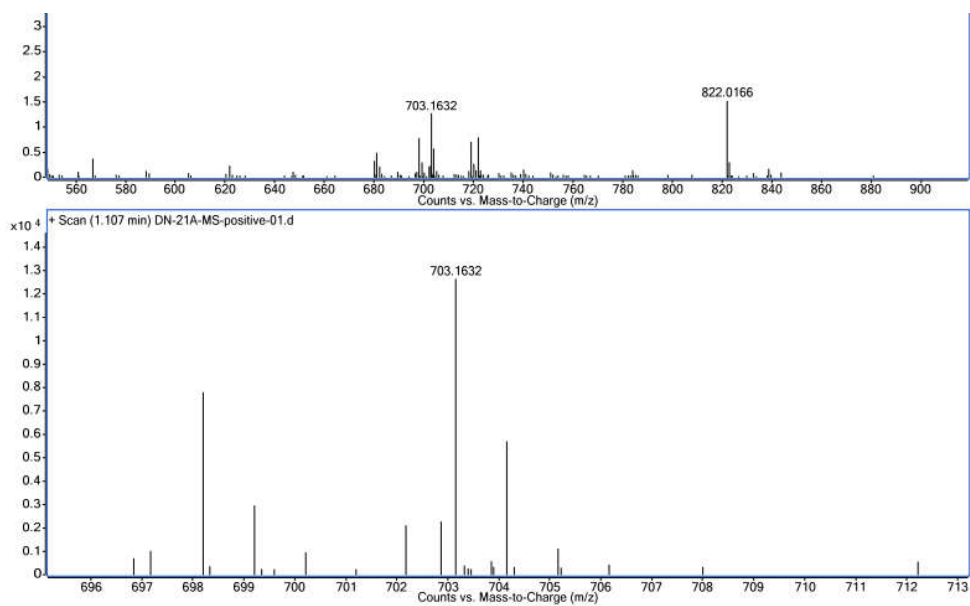

**Elemental Composition Calculator**

|                                                   |                                                  |                     |                  |                 |                     |
|---------------------------------------------------|--------------------------------------------------|---------------------|------------------|-----------------|---------------------|
| <b>Target m/z:</b>                                | 703.1632                                         | <b>Result type:</b> | Positive ions    | <b>Species:</b> | [M+Na] <sup>+</sup> |
| <b>Elements:</b>                                  | C (0-80); H (0-120); O (0-30); N(0-10); Na (0-5) |                     |                  |                 |                     |
| <b>Ion Formula</b>                                | <b>Calculated m/z</b>                            |                     | <b>PPM Error</b> |                 |                     |
| C <sub>34</sub> H <sub>32</sub> NaO <sub>15</sub> | 703.1633                                         |                     | 0.14             |                 |                     |

**Figure S13.** HRESIMS spectrum of lentulin B (3)

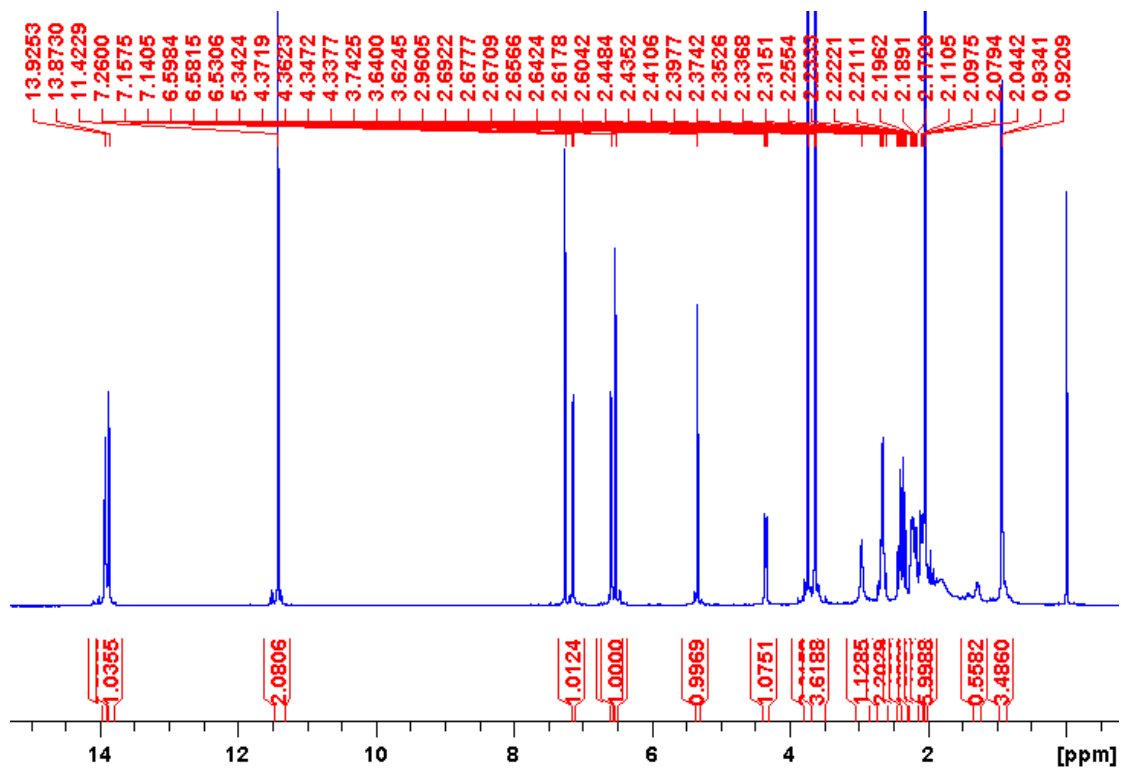

**Figure S14.** <sup>1</sup>H NMR spectrum (500 MHz, CDCl<sub>3</sub>) of lentulin B (3)

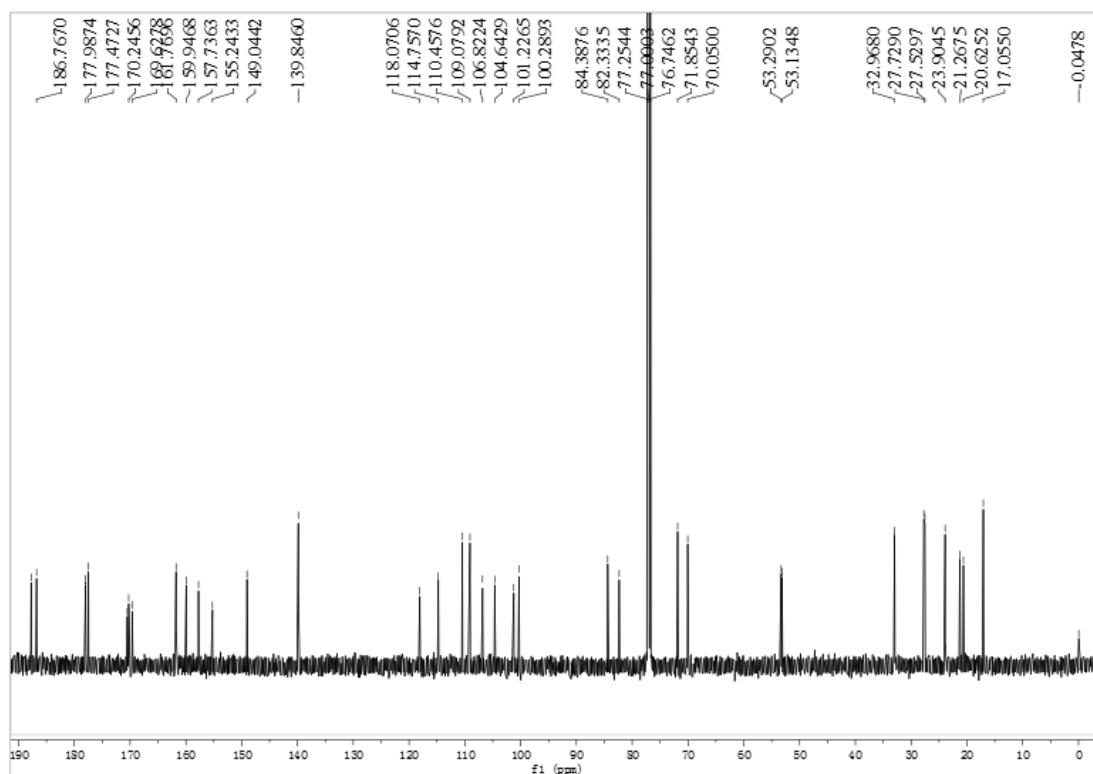

**Figure S15.** <sup>13</sup>C NMR spectrum (125 MHz, CDCl<sub>3</sub>) of lentulin B (3)



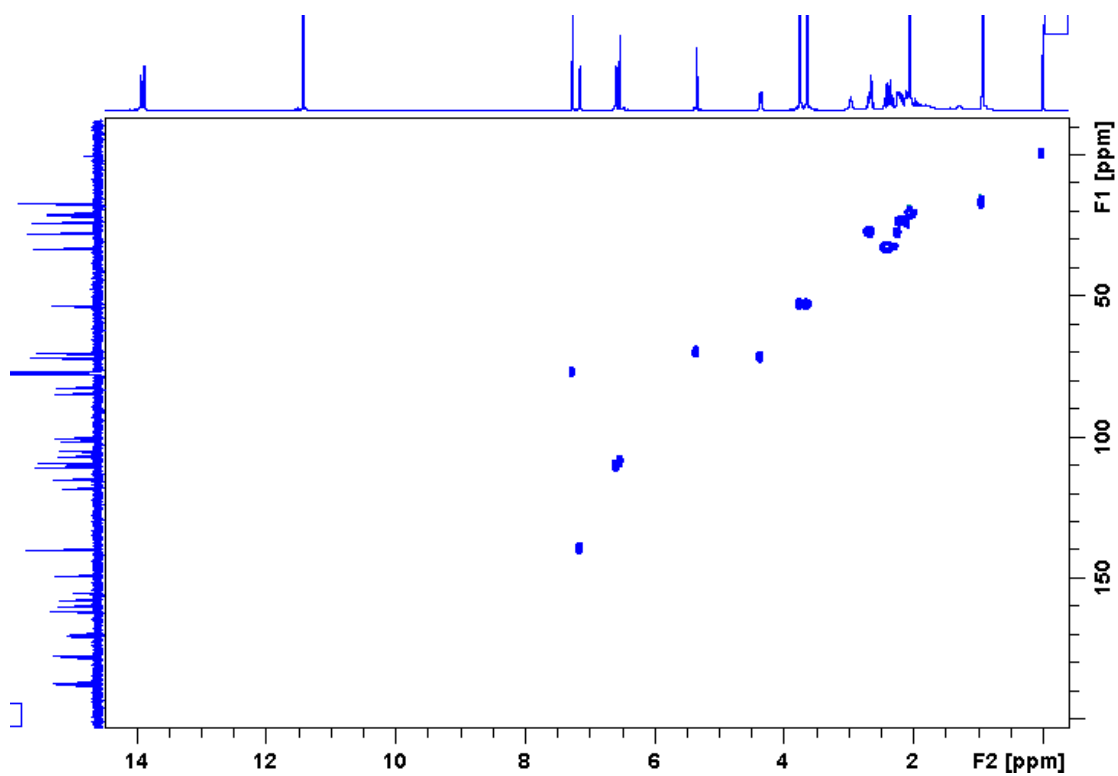

**Figure S16.** HSQC spectrum (CDCl<sub>3</sub>) of lentulin B (**3**)

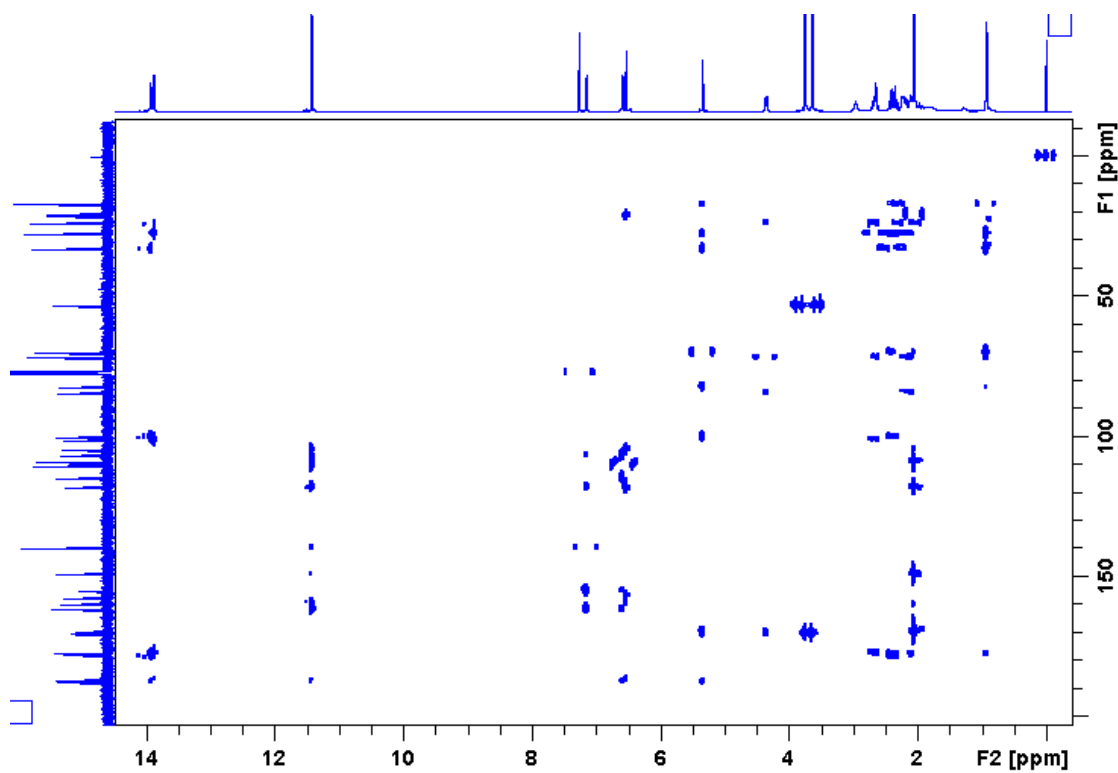

**Figure S17.** HMBC spectrum (CDCl<sub>3</sub>) of lentulin B (**3**)

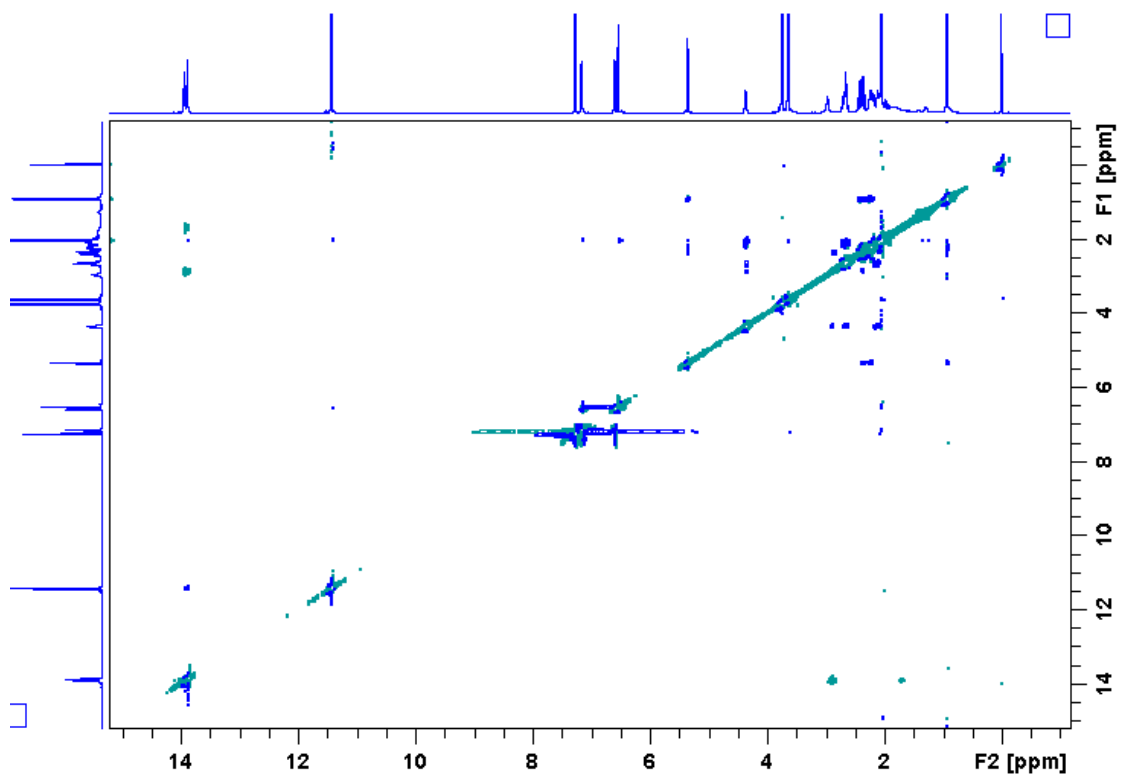

**Figure S18.** ROESY spectrum ( $\text{CDCl}_3$ ) of lentulin B (**3**)

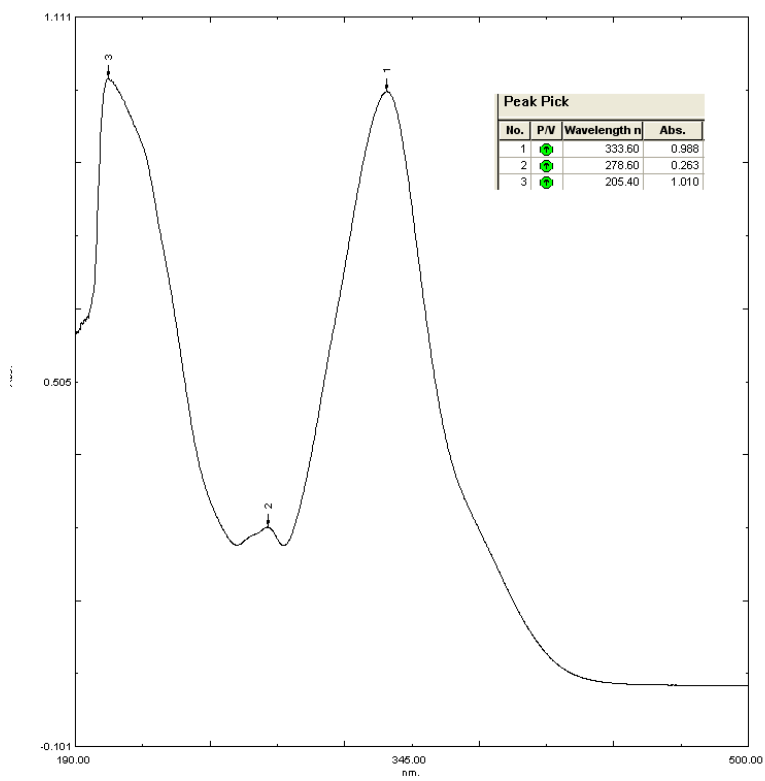

**Figure S19.** UV spectrum (MeOH) of lentulin B (**3**)

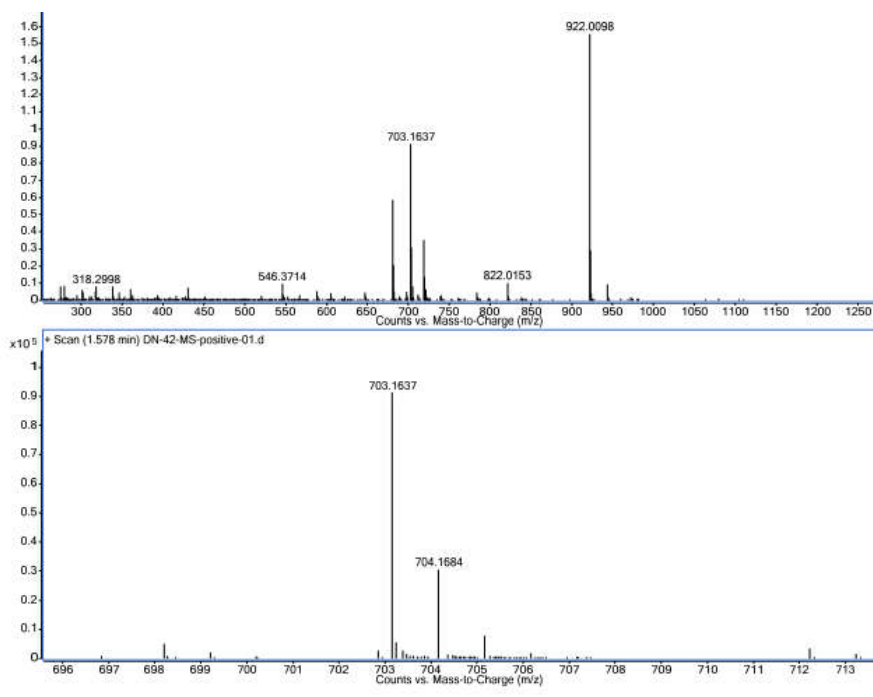

**Elemental Composition Calculator**

| Target m/z:                                       | 703.1637                                         | Result type:          | Positive ions | Species:         | [M+Na] <sup>+</sup> |
|---------------------------------------------------|--------------------------------------------------|-----------------------|---------------|------------------|---------------------|
| <b>Elements:</b>                                  | C (0-80); H (0-120); O (0-30); N(0-10); Na (0-5) |                       |               |                  |                     |
| <b>Ion Formula</b>                                |                                                  | <b>Calculated m/z</b> |               | <b>PPM Error</b> |                     |
| C <sub>34</sub> H <sub>32</sub> NaO <sub>15</sub> |                                                  | 703.1633              |               | -0.44            |                     |

**Figure S20.** HRESIMS spectrum of lentulin C (4)

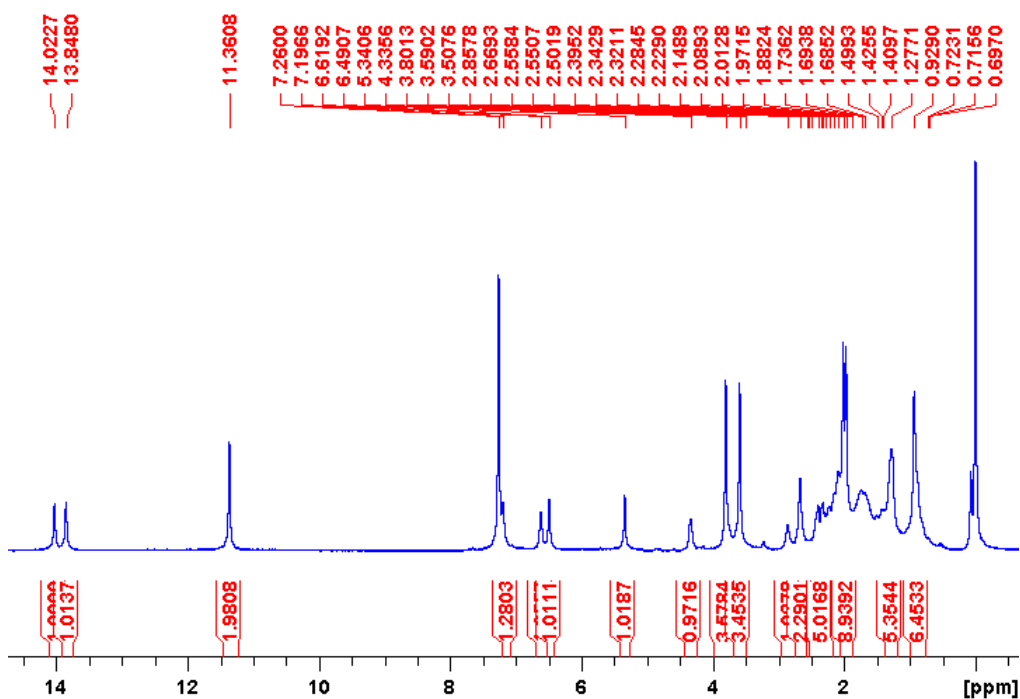

**Figure S21.** <sup>1</sup>H NMR spectrum (500 MHz, CDCl<sub>3</sub>) of lentulin C (4)

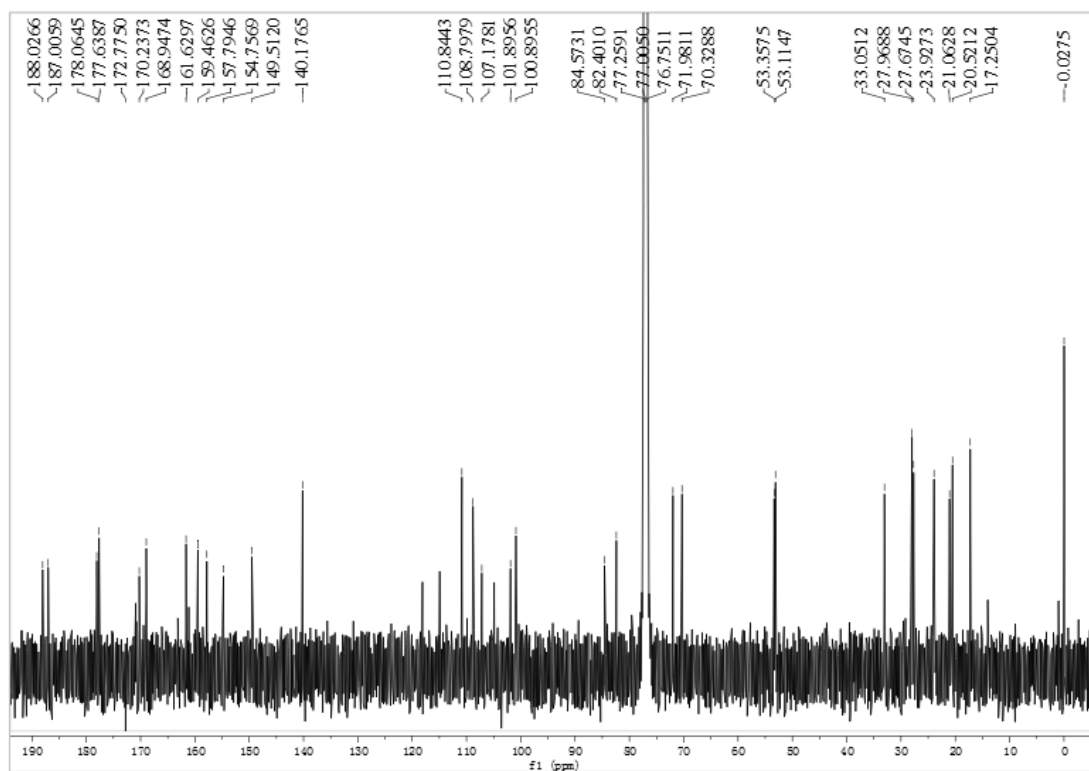

**Figure S22.**  $^{13}\text{C}$  NMR spectrum (125 MHz,  $\text{CDCl}_3$ ) of lentulin C (4)

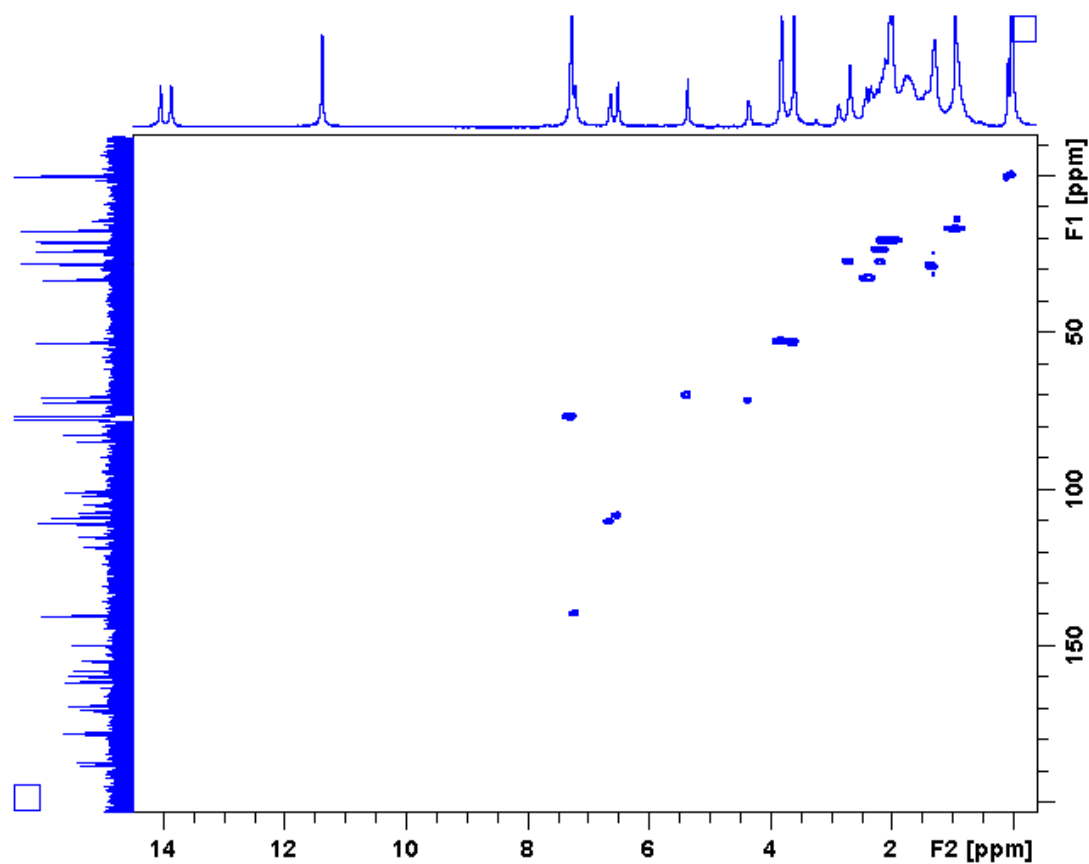

**Figure S23.** HSQC spectrum ( $\text{CDCl}_3$ ) of lentulin C (4)

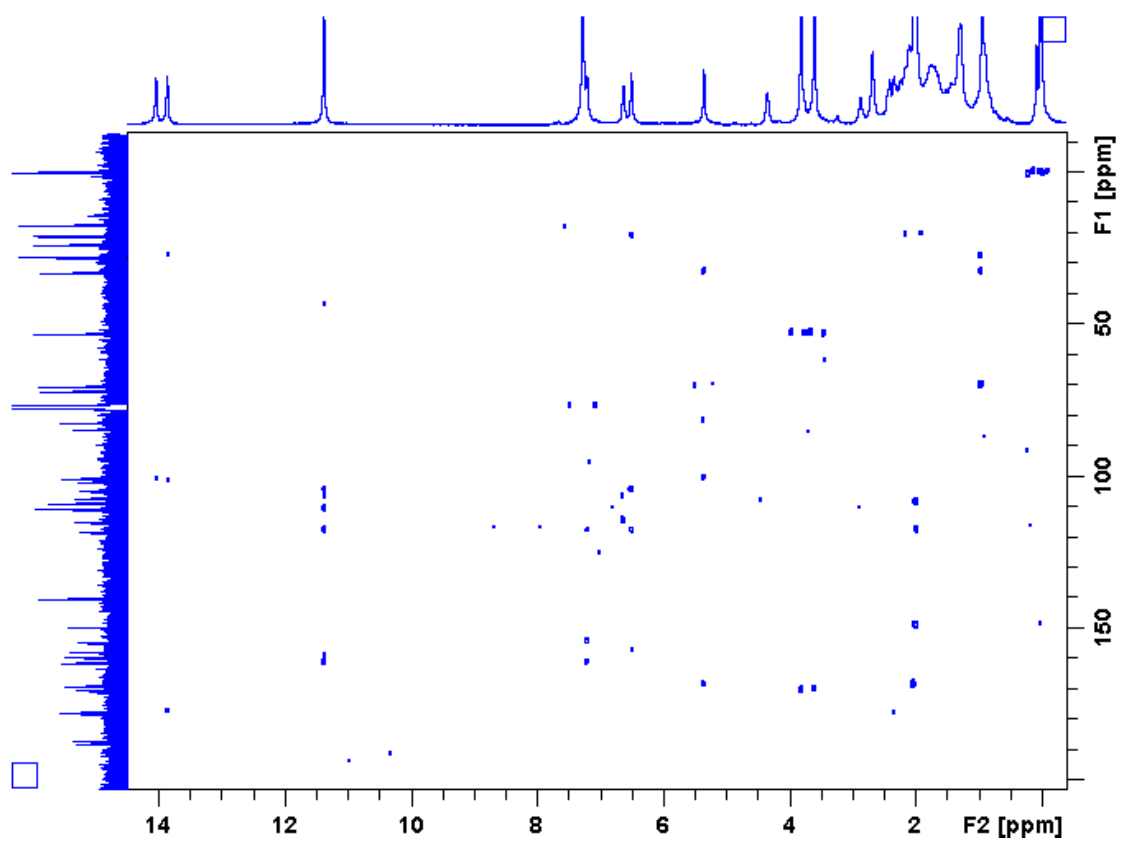

**Figure S24.** HMBC spectrum (CDCl<sub>3</sub>) of lentulin C (4)

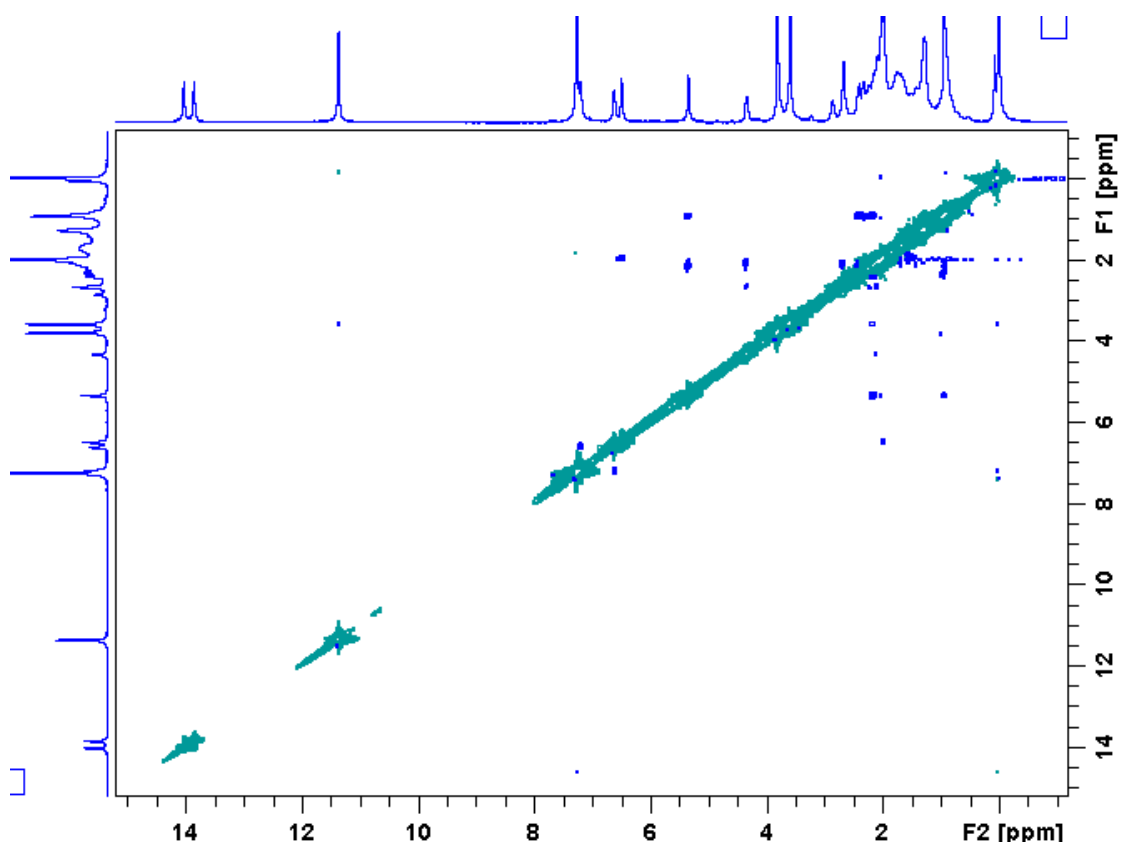

**Figure S25.** ROESY spectrum (CDCl<sub>3</sub>) of lentulin C (4)

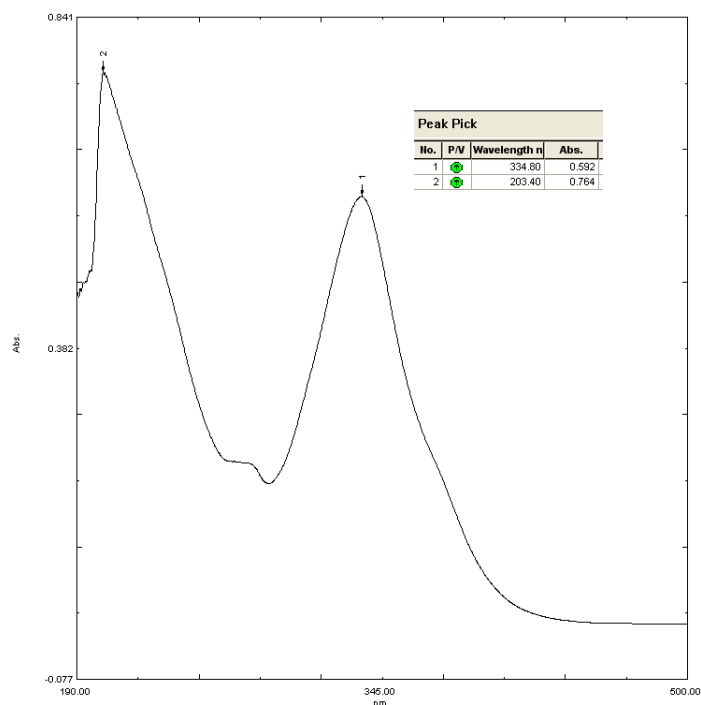

**Figure S26.** UV spectrum (MeOH) of lentulin C (4)

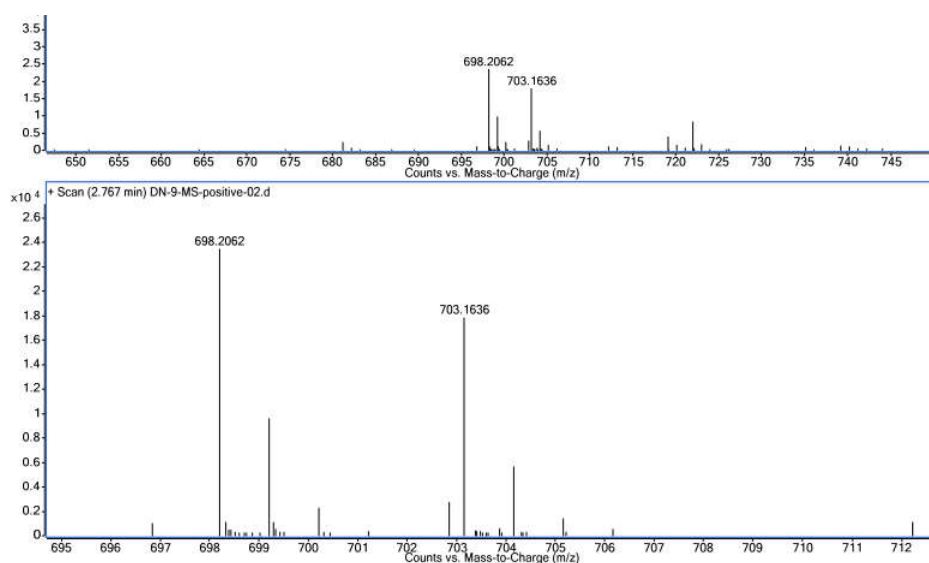

**Elemental Composition Calculator**

|                    |                                                  |                     |                  |                 |                     |
|--------------------|--------------------------------------------------|---------------------|------------------|-----------------|---------------------|
| <b>Target m/z:</b> | 703.1636                                         | <b>Result type:</b> | Positive ions    | <b>Species:</b> | [M+Na] <sup>+</sup> |
| <b>Elements:</b>   | C (0-80); H (0-120); O (0-30); N(0-10); Na (0-5) |                     |                  |                 |                     |
| <b>Ion Formula</b> | <b>Calculated m/z</b>                            |                     | <b>PPM Error</b> |                 |                     |
| C34H32NaO15        | 703.1633                                         |                     | -0.38            |                 |                     |

**Figure S27.** HRESIMS spectrum of lentulin D (5)



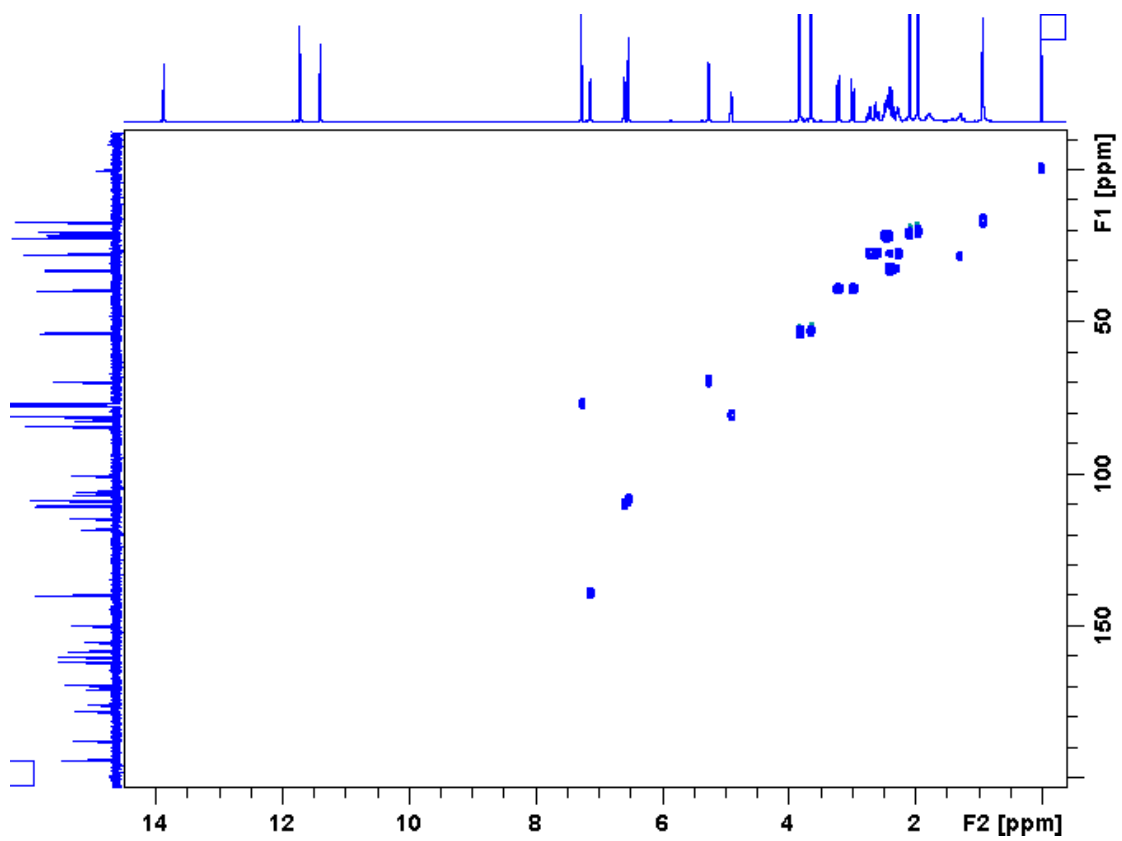

**Figure S30.** HSQC spectrum ( $\text{CDCl}_3$ ) of lentulin D (**5**)

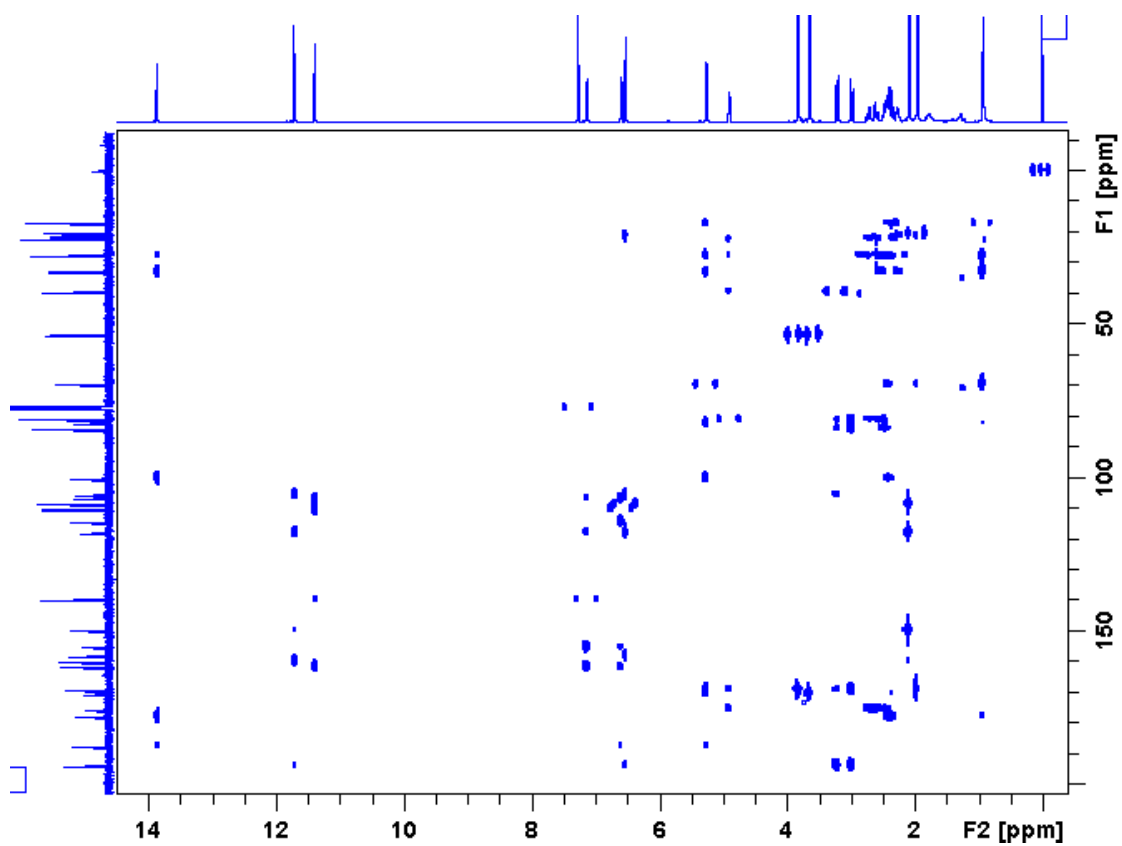

**Figure S31.** HMBC spectrum ( $\text{CDCl}_3$ ) of lentulin D (**5**)



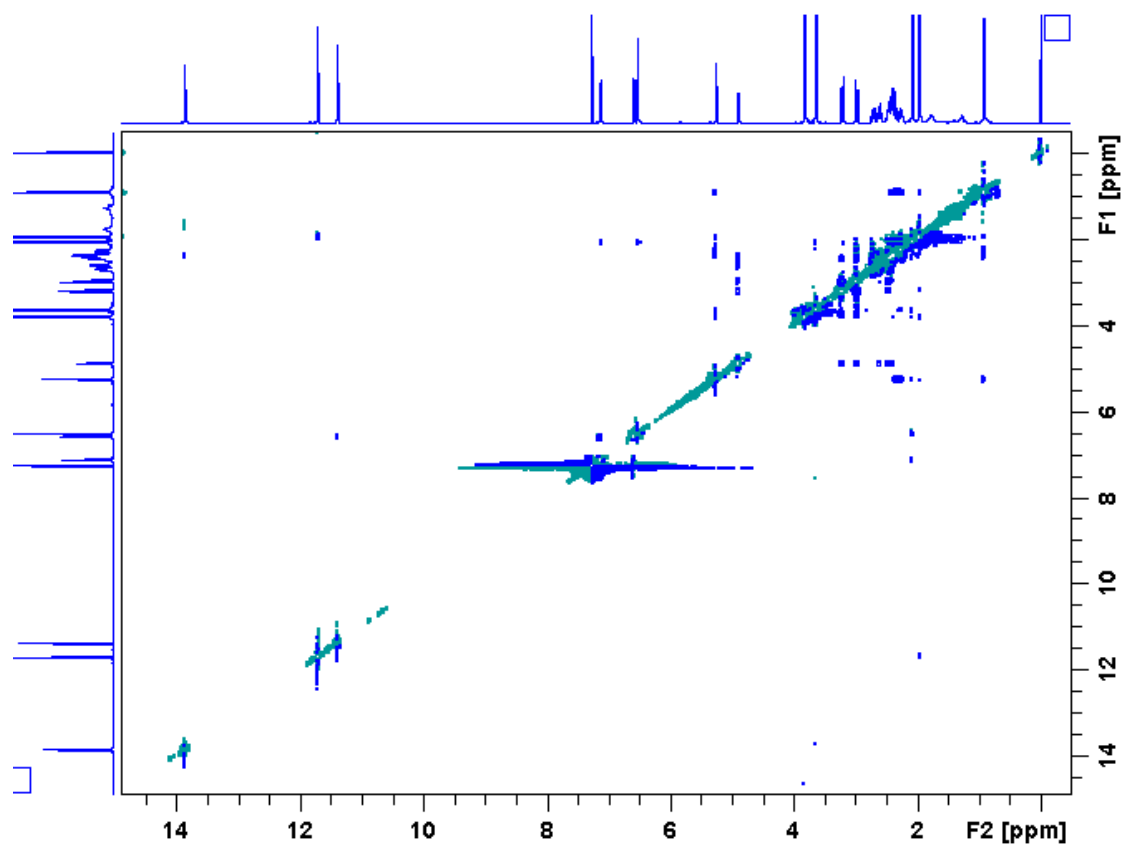

**Figure S32.** ROESY spectrum ( $\text{CDCl}_3$ ) of lentulin D (**5**)

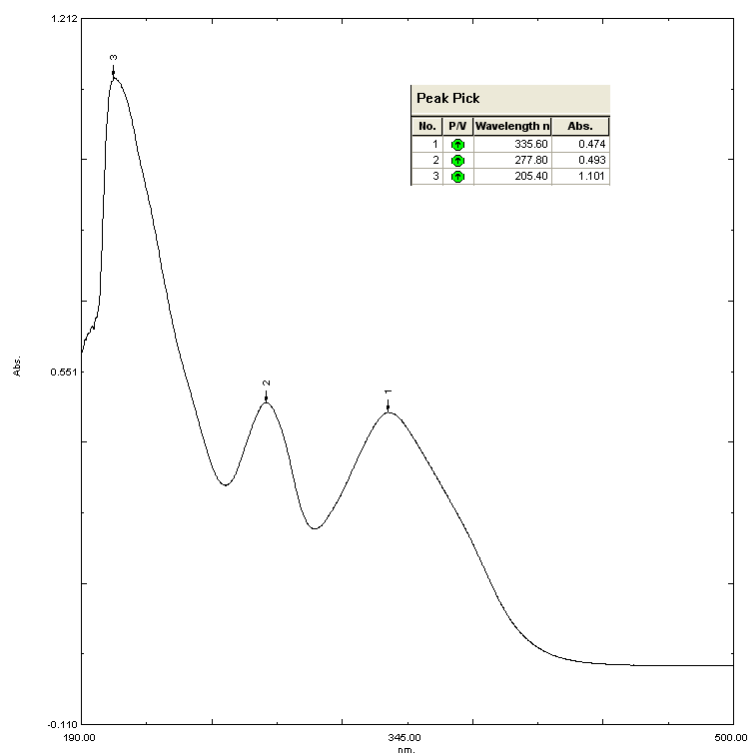

**Figure S33.** UV spectrum (MeOH) of lentulin D (**5**)

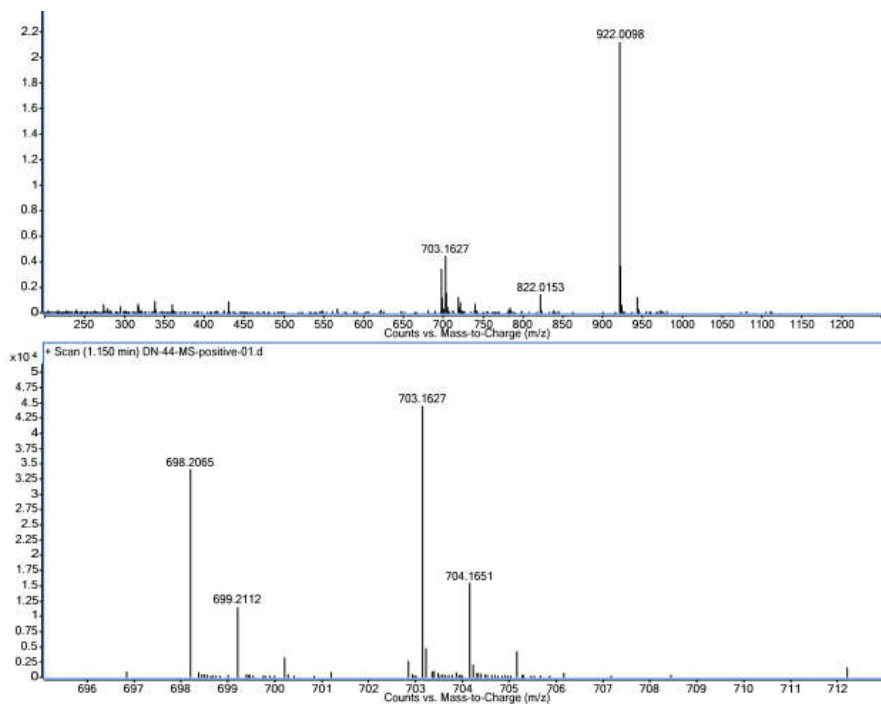

#### Elemental Composition Calculator

|                                                   |                                                  |                       |               |                  |                     |
|---------------------------------------------------|--------------------------------------------------|-----------------------|---------------|------------------|---------------------|
| <b>Target m/z:</b>                                | 703.1627                                         | <b>Result type:</b>   | Positive ions | <b>Species:</b>  | [M+Na] <sup>+</sup> |
| <b>Elements:</b>                                  | C (0-80); H (0-120); O (0-30); N(0-10); Na (0-5) |                       |               |                  |                     |
| <b>Ion Formula</b>                                |                                                  | <b>Calculated m/z</b> |               | <b>PPM Error</b> |                     |
| C <sub>34</sub> H <sub>32</sub> NaO <sub>15</sub> |                                                  | 703.1633              |               | 0.97             |                     |

Figure S34. HRESIMS spectrum of lentulin E (6)

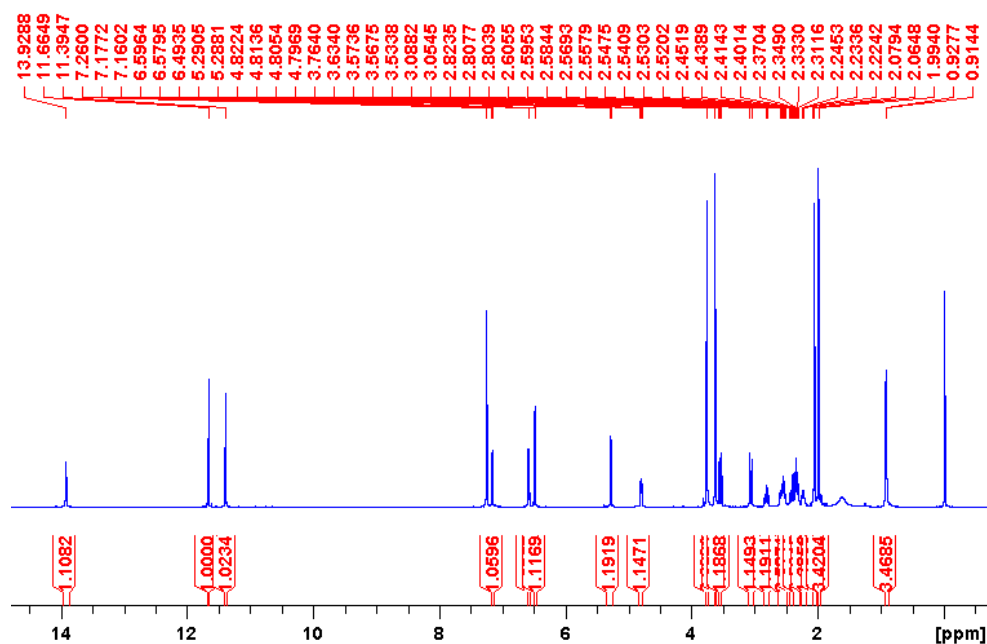

Figure S35. <sup>1</sup>H NMR spectrum (500 MHz, CDCl<sub>3</sub>) of lentulin E (6)

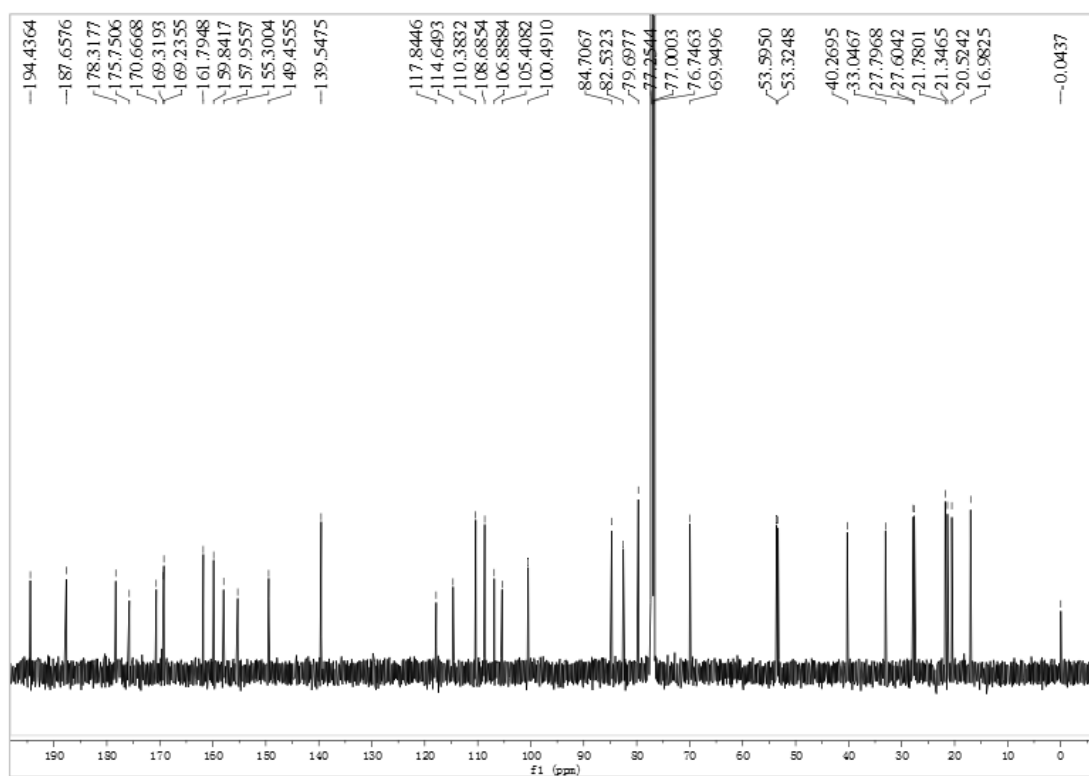

**Figure S36.**  $^{13}\text{C}$  NMR spectrum (125 MHz,  $\text{CDCl}_3$ ) of lentulin E (**6**)

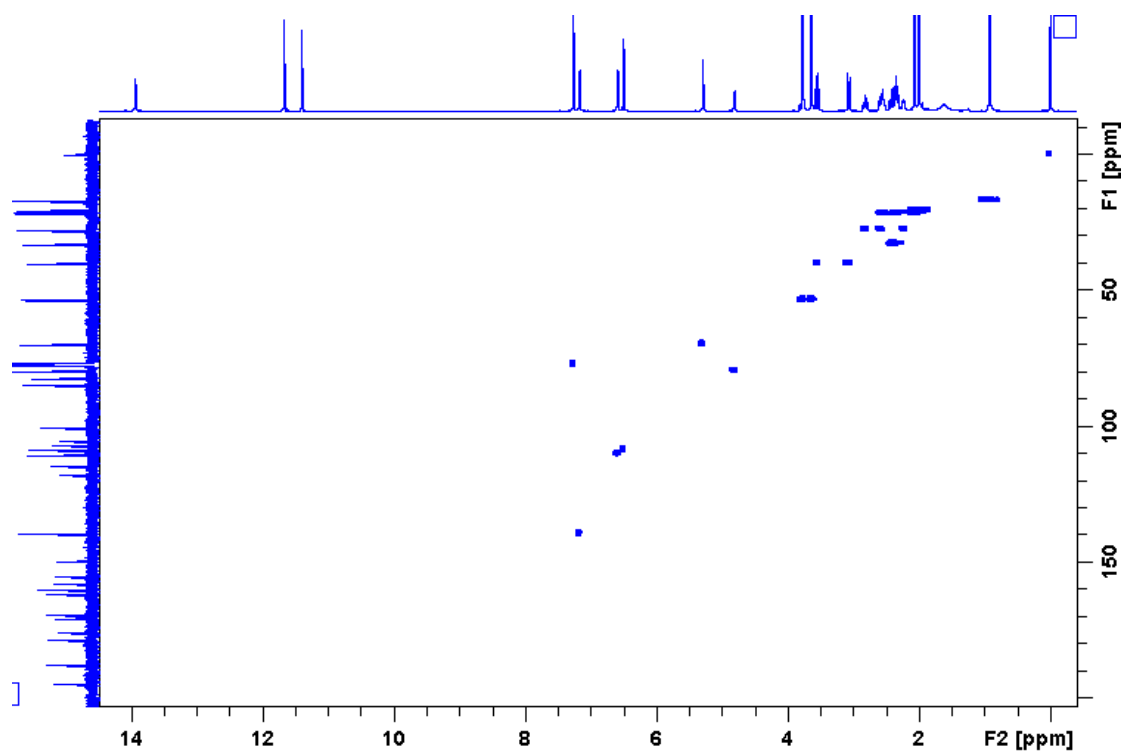

**Figure S37.** HSQC spectrum ( $\text{CDCl}_3$ ) of lentulin E (**6**)

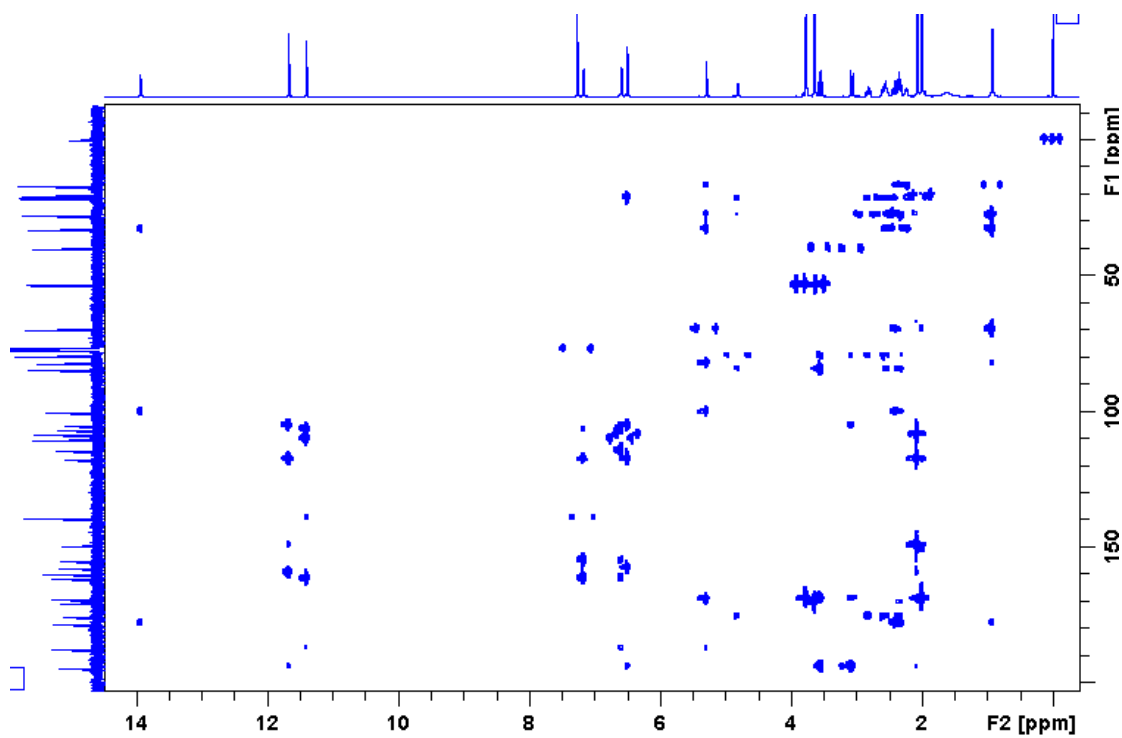

**Figure S38.** HMBC spectrum (CDCl<sub>3</sub>) of lentulin E (**6**)

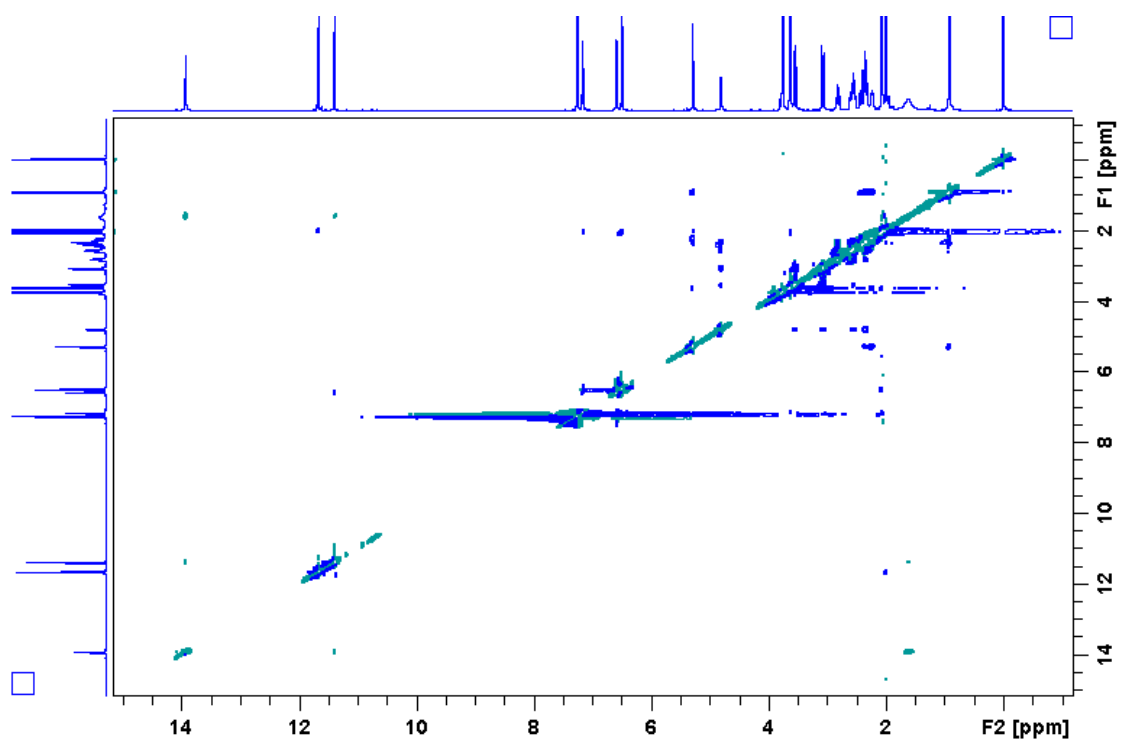

**Figure S39.** ROESY spectrum (CDCl<sub>3</sub>) of lentulin E (**6**)

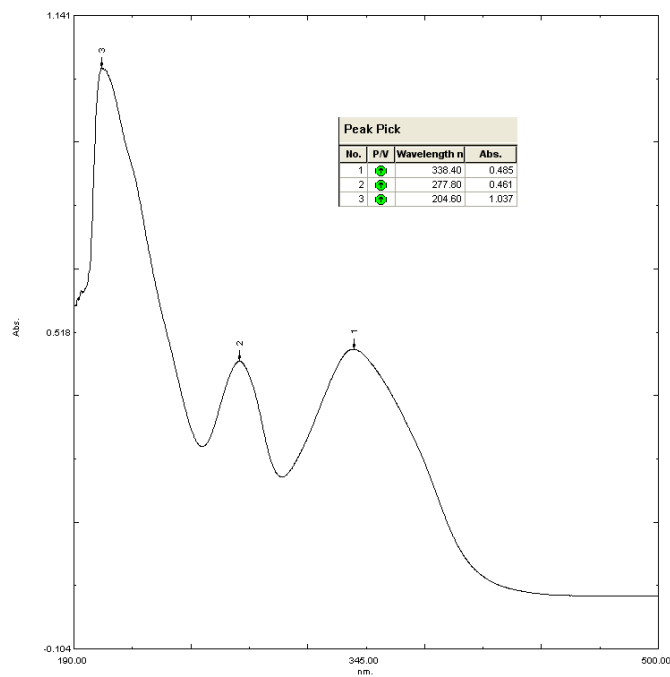

**Figure S40.** UV spectrum (MeOH) of lentulin E (6)

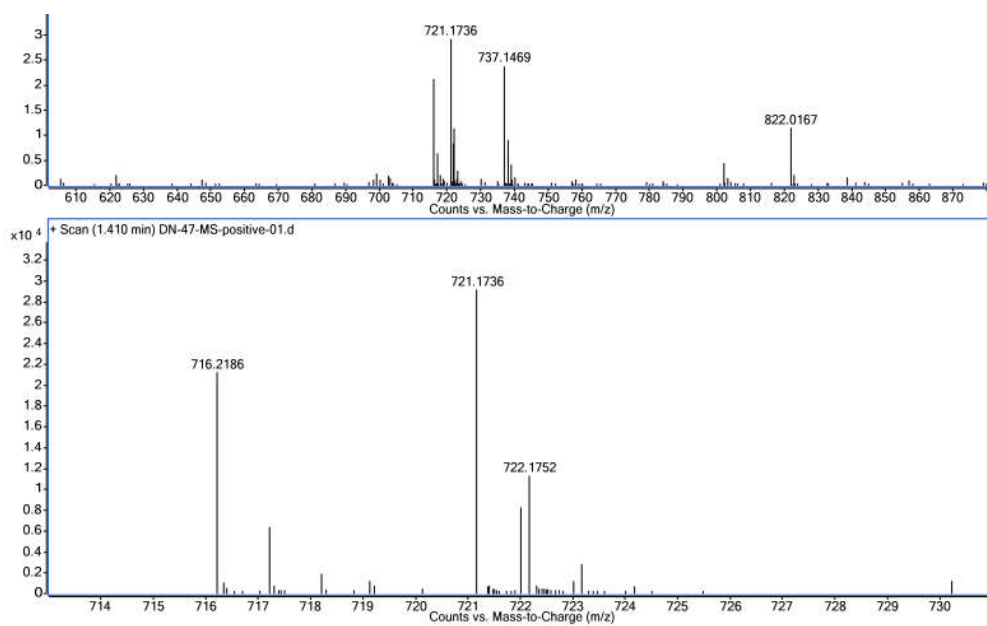

**Elemental Composition Calculator**

|                    |                                                  |                     |               |                 |                     |
|--------------------|--------------------------------------------------|---------------------|---------------|-----------------|---------------------|
| <b>Target m/z:</b> | 721.1736                                         | <b>Result type:</b> | Positive ions | <b>Species:</b> | [M+Na] <sup>+</sup> |
| <b>Elements:</b>   | C (0-80); H (0-120); O (0-30); N(0-10); Na (0-5) |                     |               |                 |                     |
| <b>Ion Formula</b> | <b>Calculated m/z</b>                            | <b>PPM Error</b>    |               |                 |                     |
| C34H34NaO16        | 721.1739                                         | 0.45                |               |                 |                     |

**Figure S41.** HRESIMS spectrum of lentulin F (7)

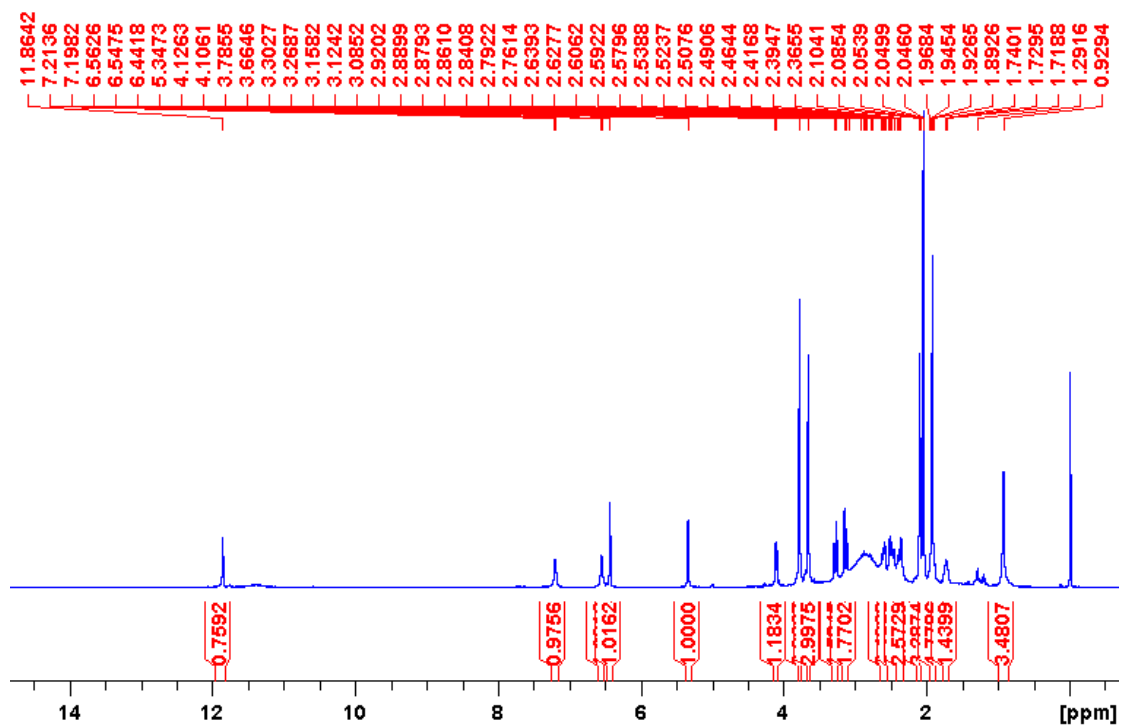

**Figure S42.**  $^1\text{H}$  NMR spectrum (500 MHz, Acetone- $d_6$ ) of lentulin F (7)

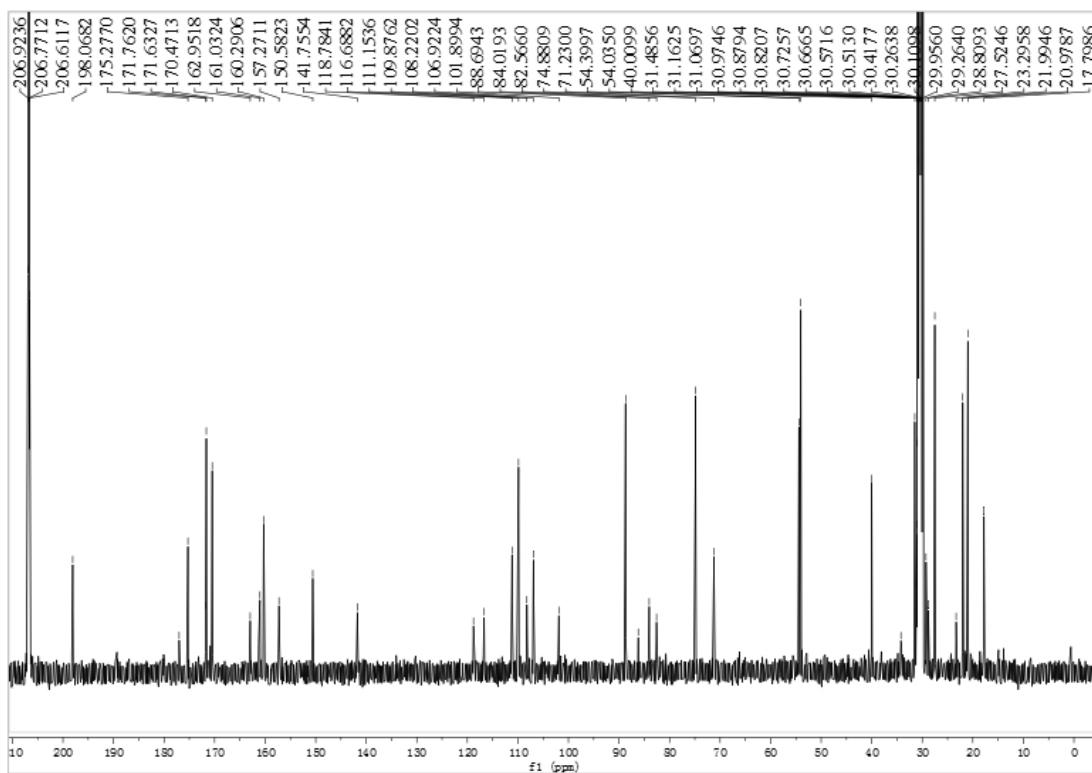

**Figure S43.**  $^{13}\text{C}$  NMR spectrum (125 MHz, Acetone- $d_6$ ) of lentulin F (7)

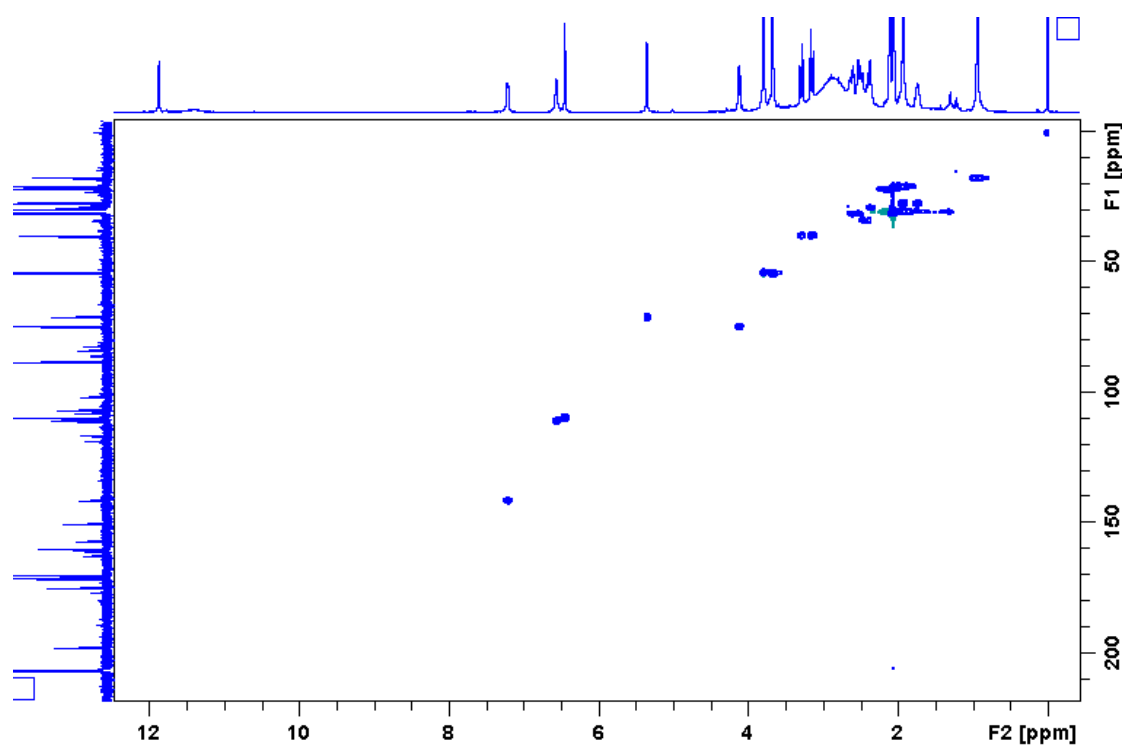

**Figure S44.** HSQC spectrum (Acetone- $d_6$ ) of lentulin F (7)

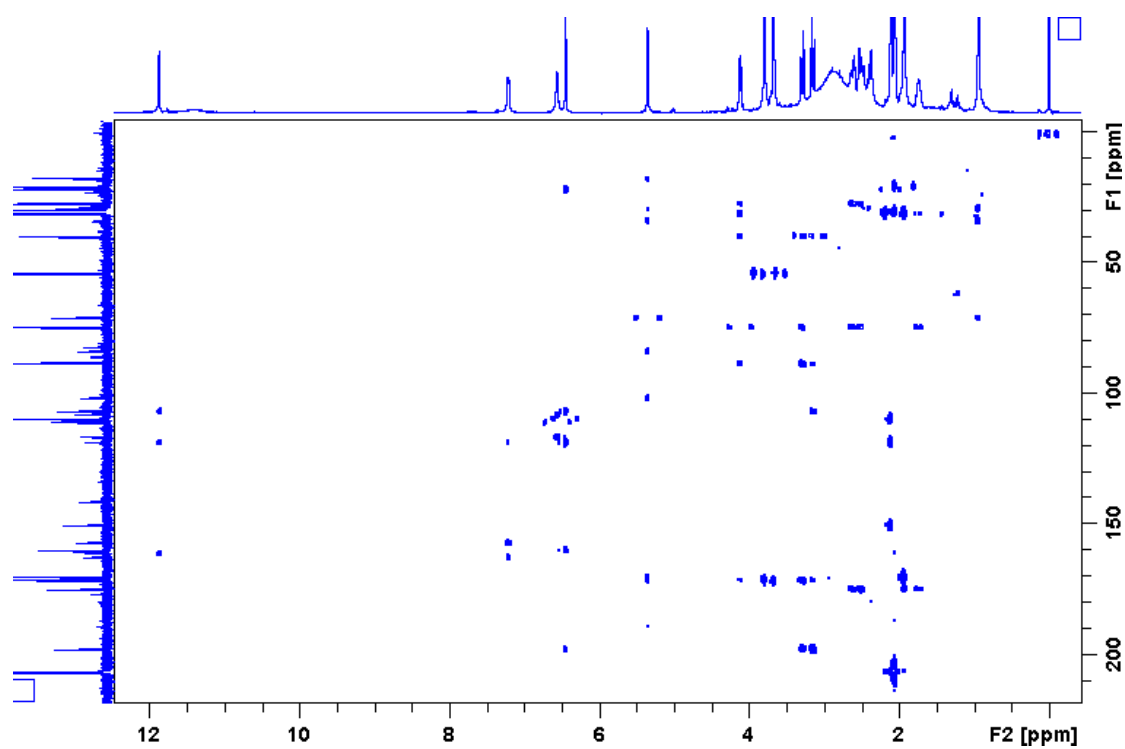

**Figure S45.** HMBC spectrum (Acetone- $d_6$ ) of lentulin F (7)

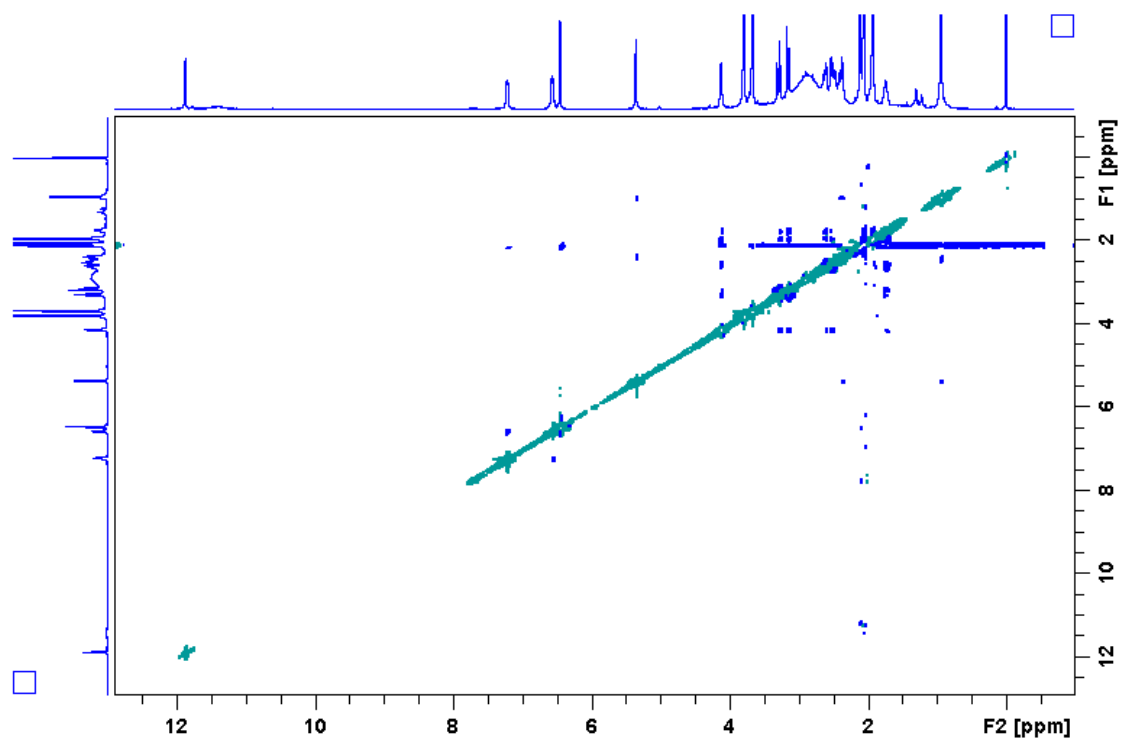

**Figure S46.** ROESY spectrum (Acetone- $d_6$ ) of lentulin F (7)

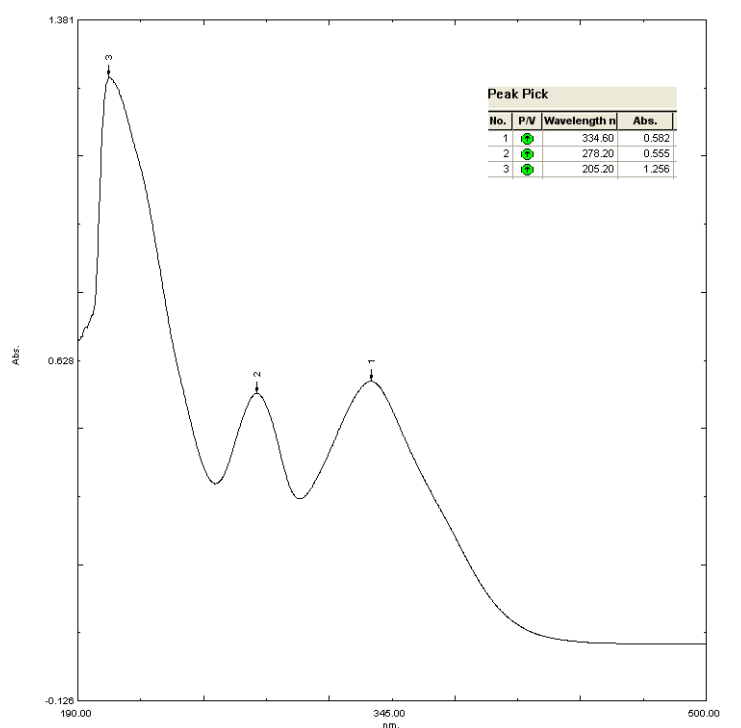

**Figure S47.** UV spectrum (MeOH) of lentulin F (7)



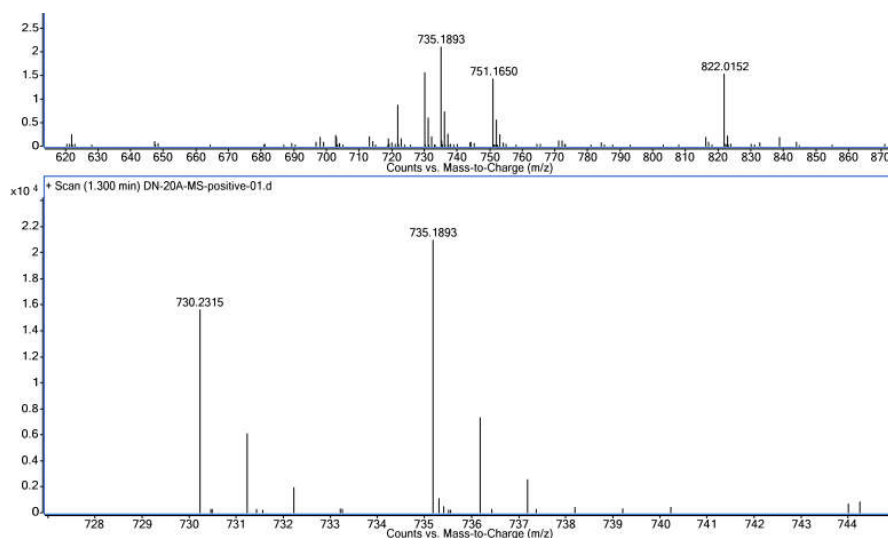

### Elemental Composition Calculator

| Target m/z:        | 735.1893                                         | Result type:     | Positive ions | Species: | [M+Na] <sup>+</sup> |
|--------------------|--------------------------------------------------|------------------|---------------|----------|---------------------|
| <b>Elements:</b>   | C (0-80); H (0-120); O (0-30); N(0-10); Na (0-5) |                  |               |          |                     |
| <b>Ion Formula</b> | <b>Calculated m/z</b>                            | <b>PPM Error</b> |               |          |                     |
| C35H36NaO16        | 735.1896                                         | 0.36             |               |          |                     |

**Figure S48.** HRESIMS spectrum of lentulin G (8)

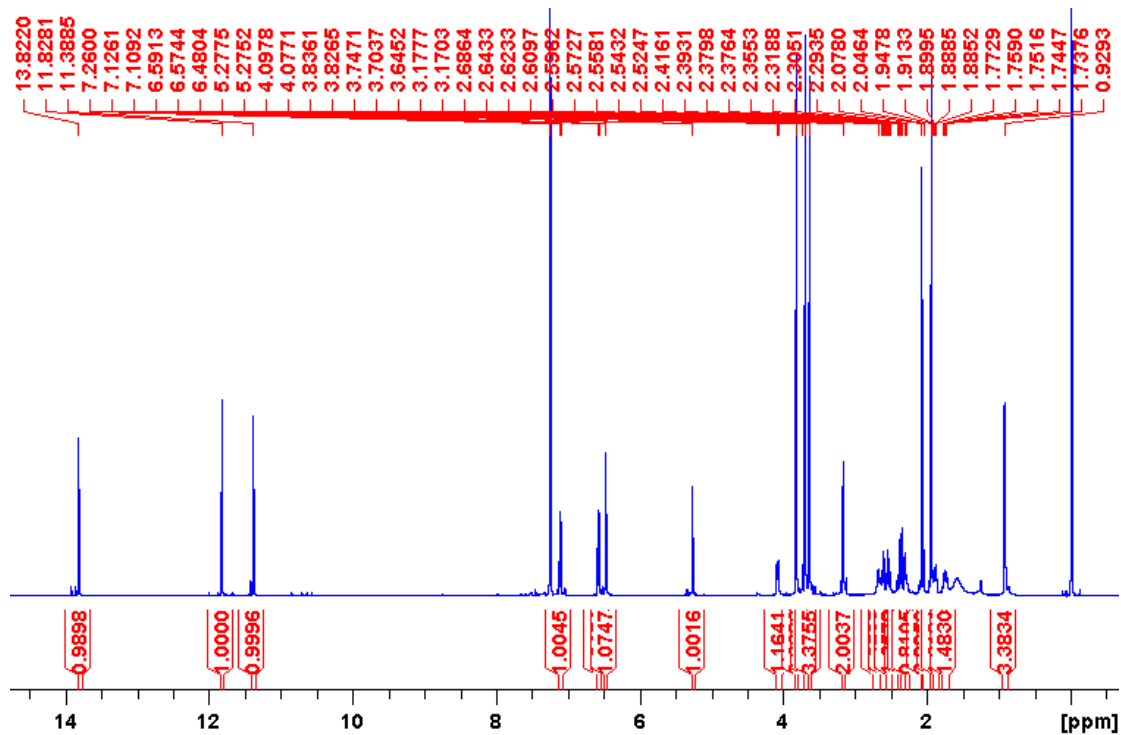

**Figure S49.** <sup>1</sup>H NMR spectrum (500 MHz, CDCl<sub>3</sub>) of lentulin G (8)

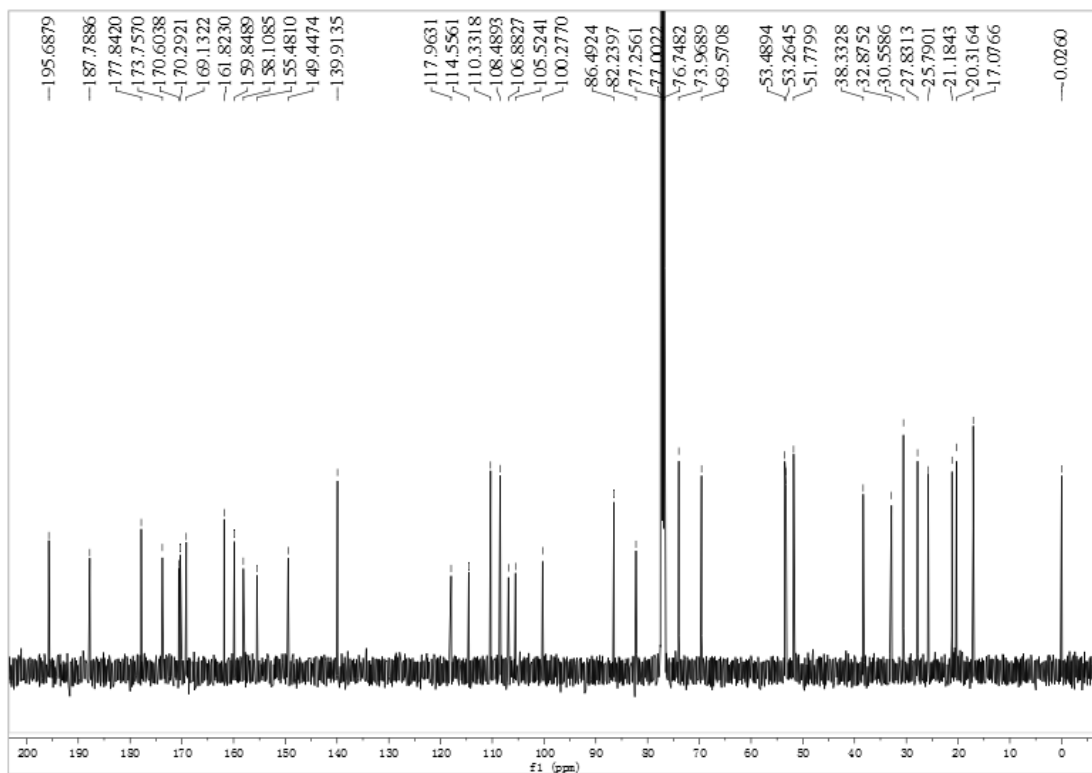

**Figure S50.**  $^{13}\text{C}$  NMR spectrum (125 MHz,  $\text{CDCl}_3$ ) of lentulin G (**8**)

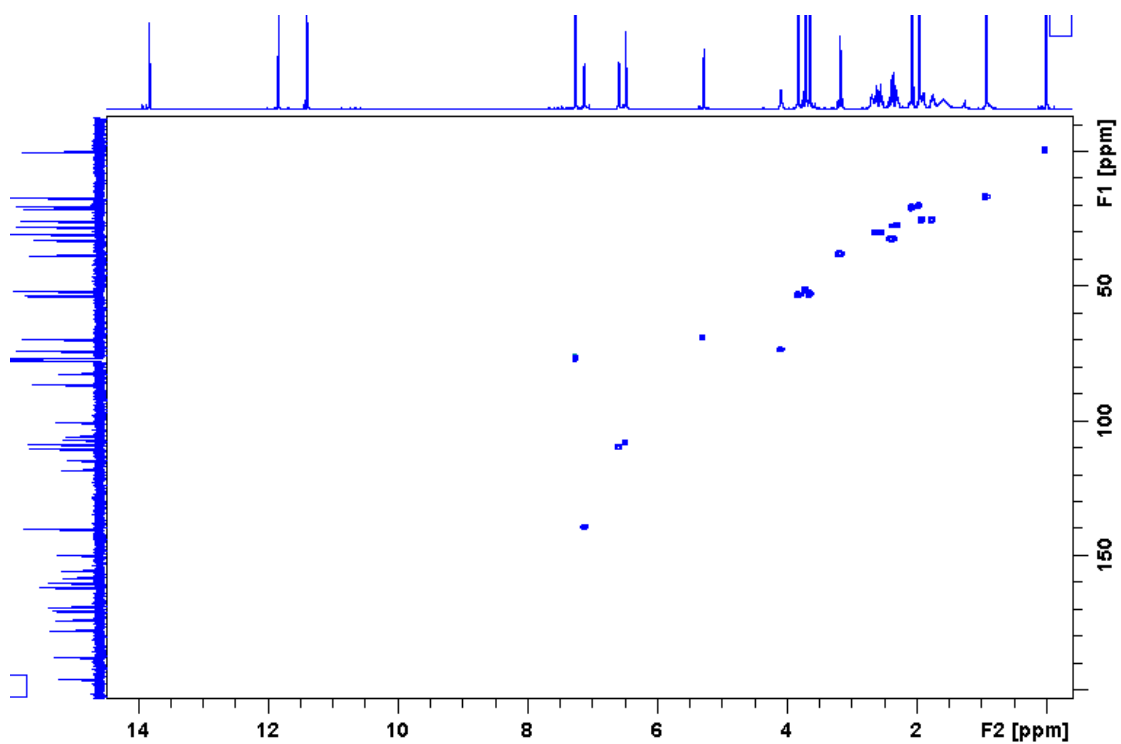

**Figure S51.** HSQC spectrum ( $\text{CDCl}_3$ ) of lentulin G (**8**)

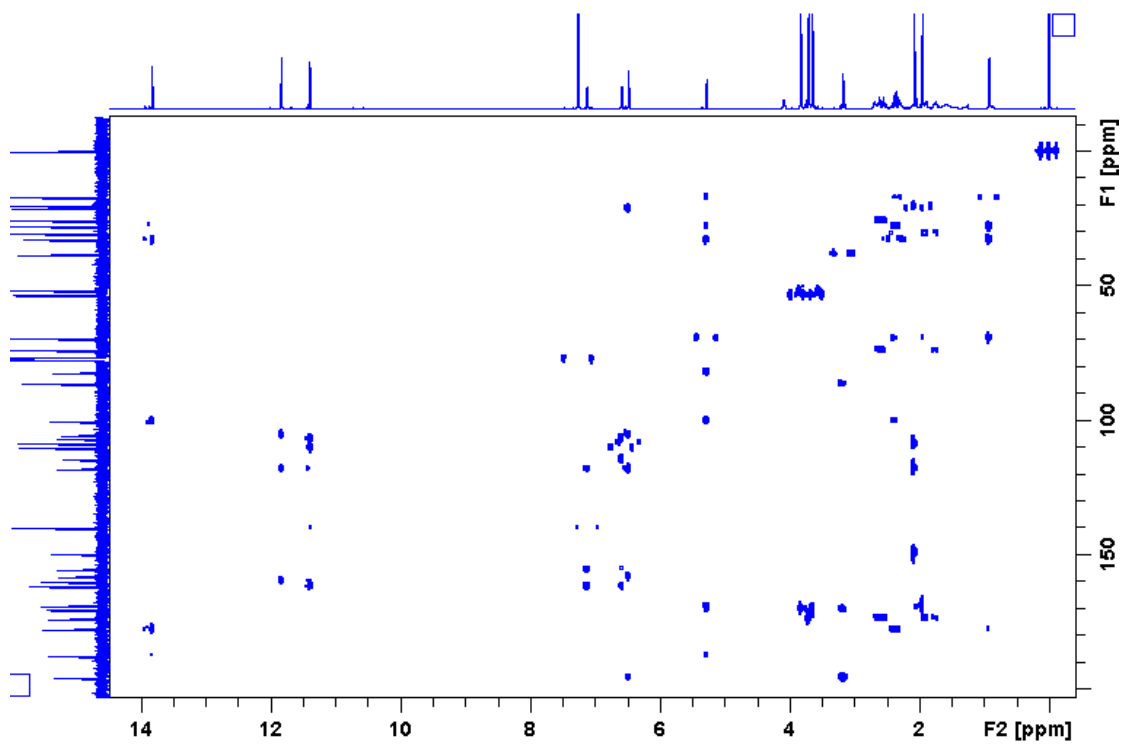

**Figure S52.** HMBC spectrum (CDCl<sub>3</sub>) of lentulin G (**8**)

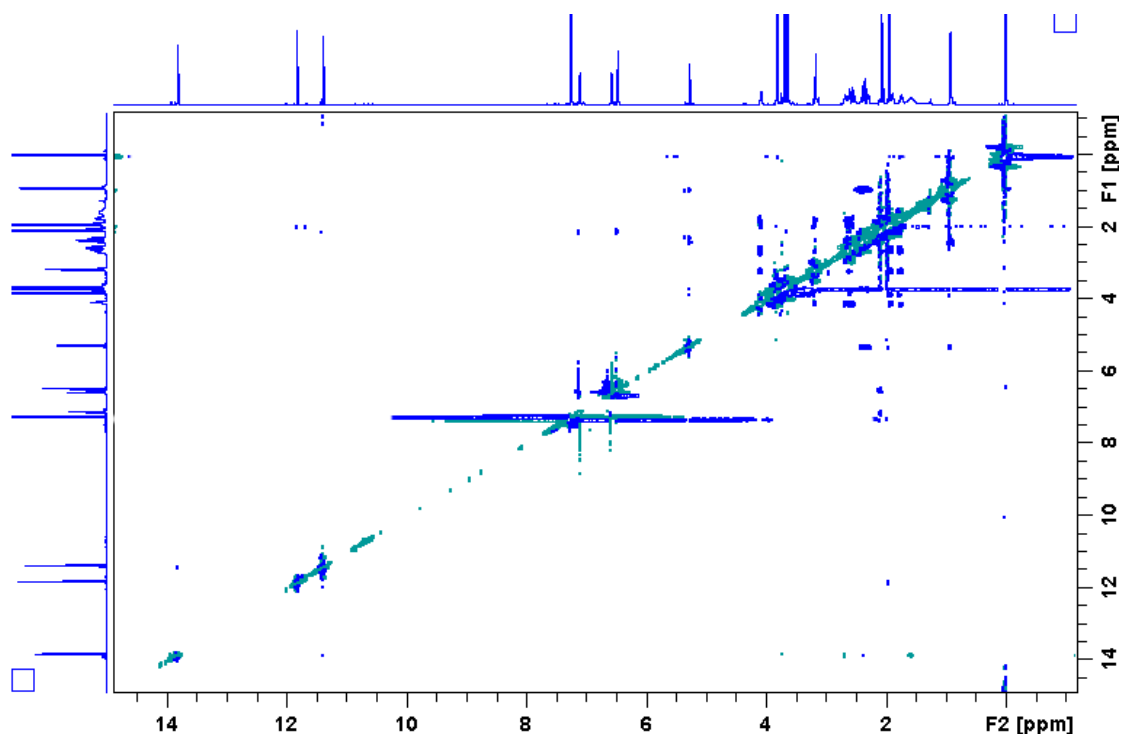

**Figure S53.** ROESY spectrum (CDCl<sub>3</sub>) of lentulin G (**8**)

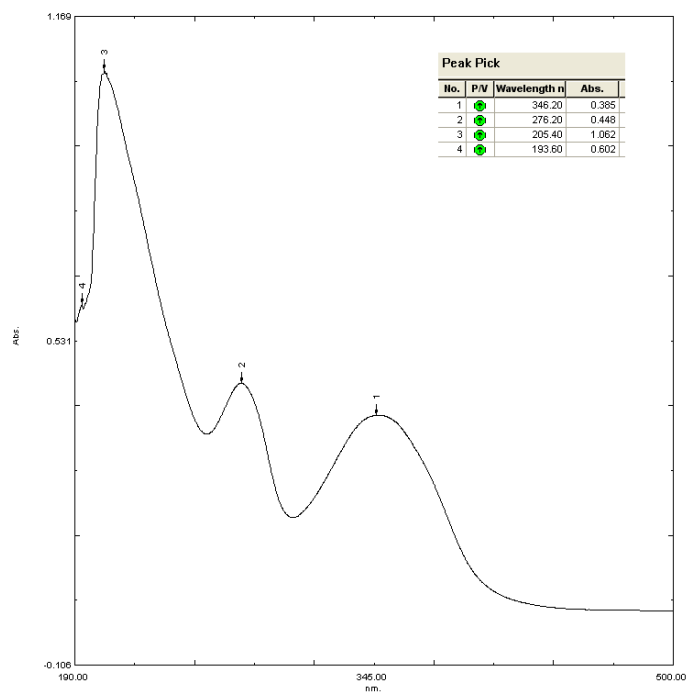

Figure S54. UV spectrum (MeOH) of lentulin G (8)

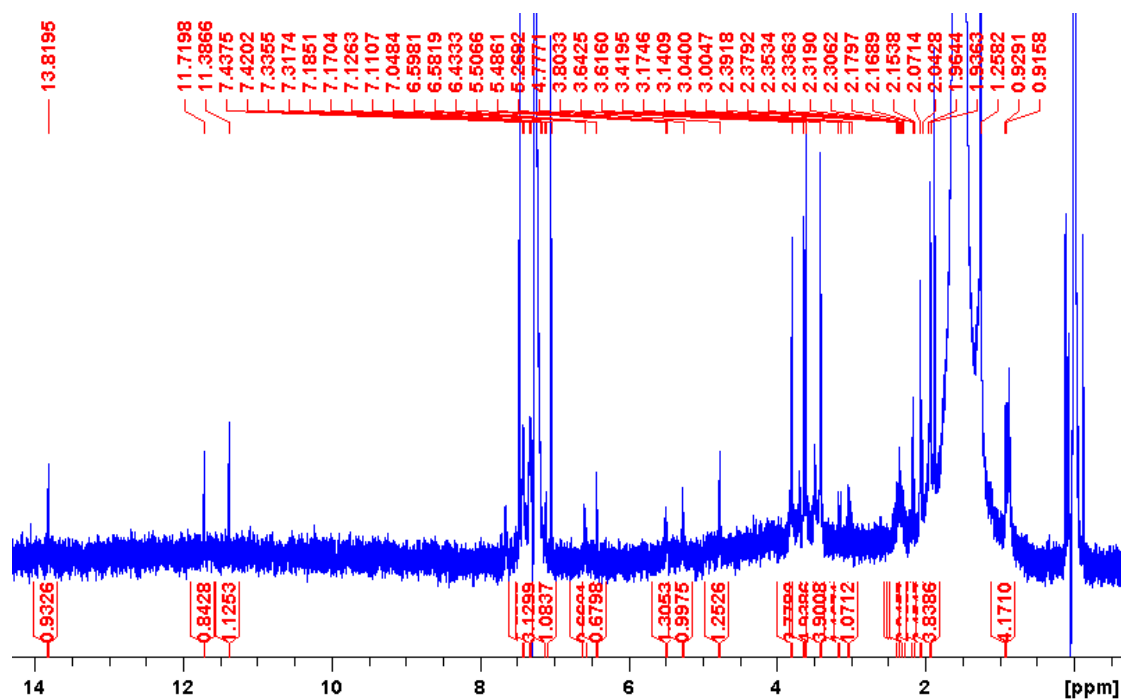

Figure S55.  $^1\text{H}$  NMR spectrum (500 MHz,  $\text{CDCl}_3$ ) of lentulin G

(*R*)-MPA ester **8a**

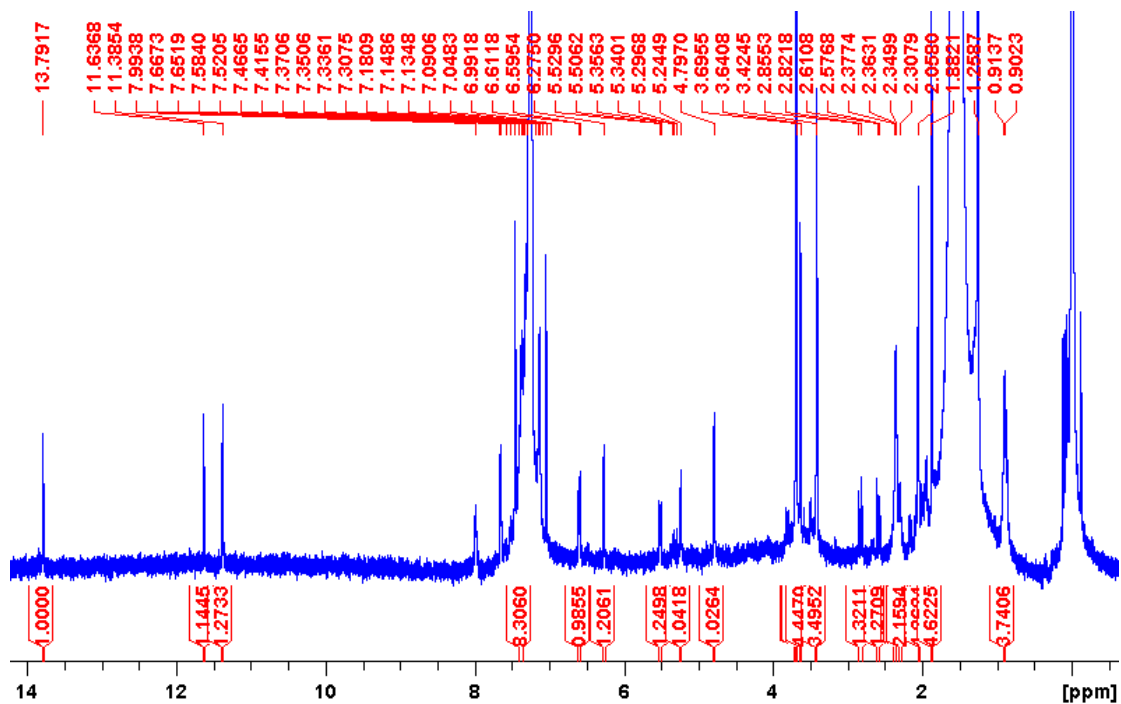

**Figure S56.**  $^1\text{H}$  NMR spectrum (500 MHz,  $\text{CDCl}_3$ ) of lentulin G (*S*)-MPA ester **8b**

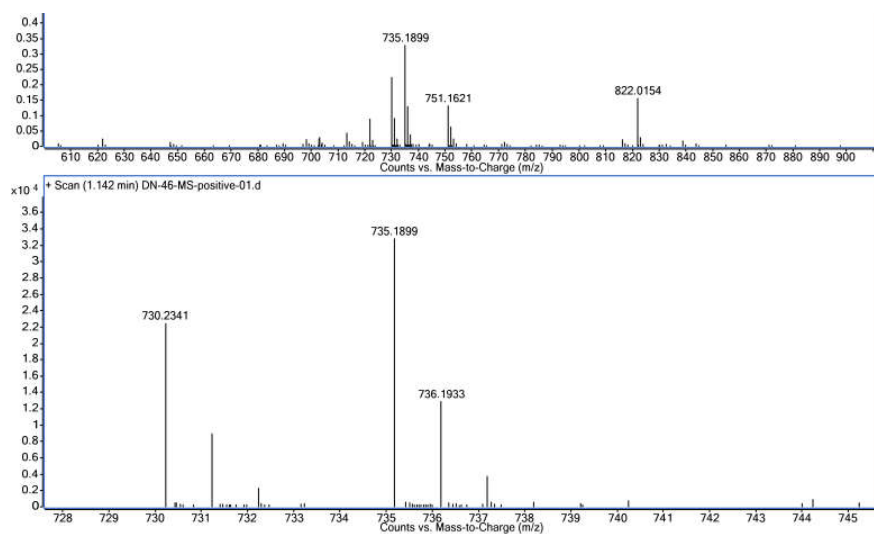

**Elemental Composition Calculator**

|             |                                                  |              |               |          |                          |
|-------------|--------------------------------------------------|--------------|---------------|----------|--------------------------|
| Target m/z: | 735.1899                                         | Result type: | Positive ions | Species: | $[\text{M}+\text{Na}]^+$ |
| Elements:   | C (0-80); H (0-120); O (0-30); N(0-10); Na (0-5) |              |               |          |                          |
| Ion Formula | Calculated m/z                                   |              | PPM Error     |          |                          |
| C35H36NaO16 | 735.1896                                         |              | -0.48         |          |                          |

**Figure S57.** HRESIMS spectrum of lentulin H (**9**)

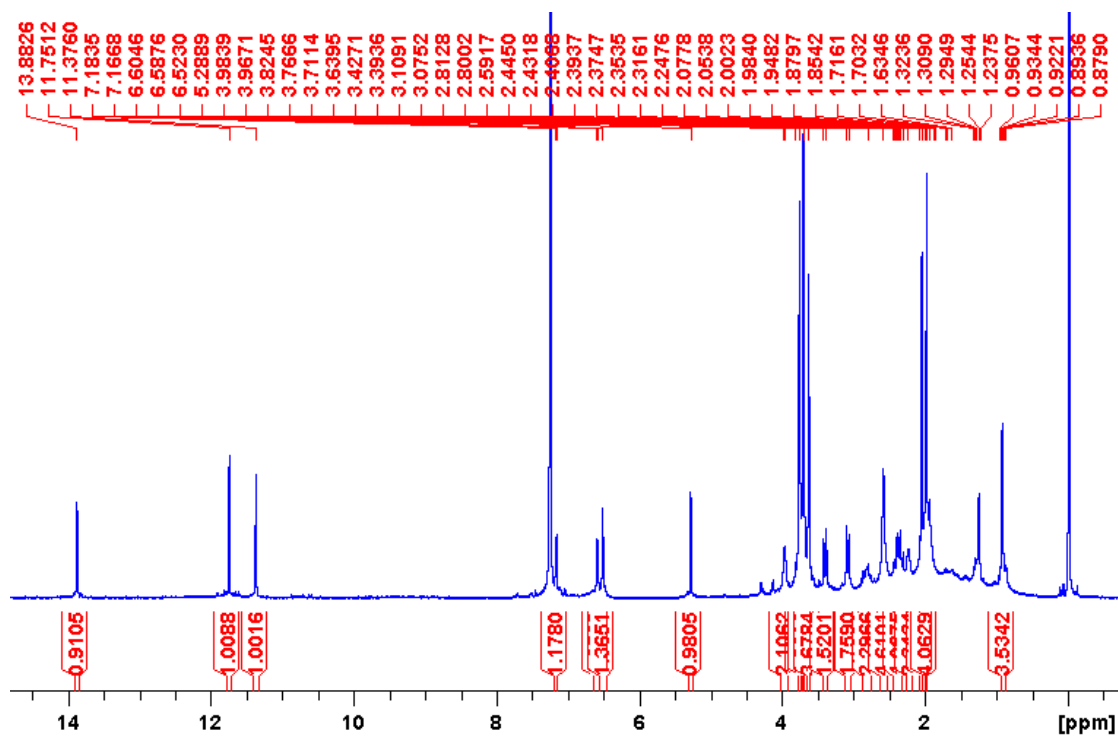

Figure S58.  $^1\text{H}$  NMR spectrum (500 MHz,  $\text{CDCl}_3$ ) of lentulin H (9)

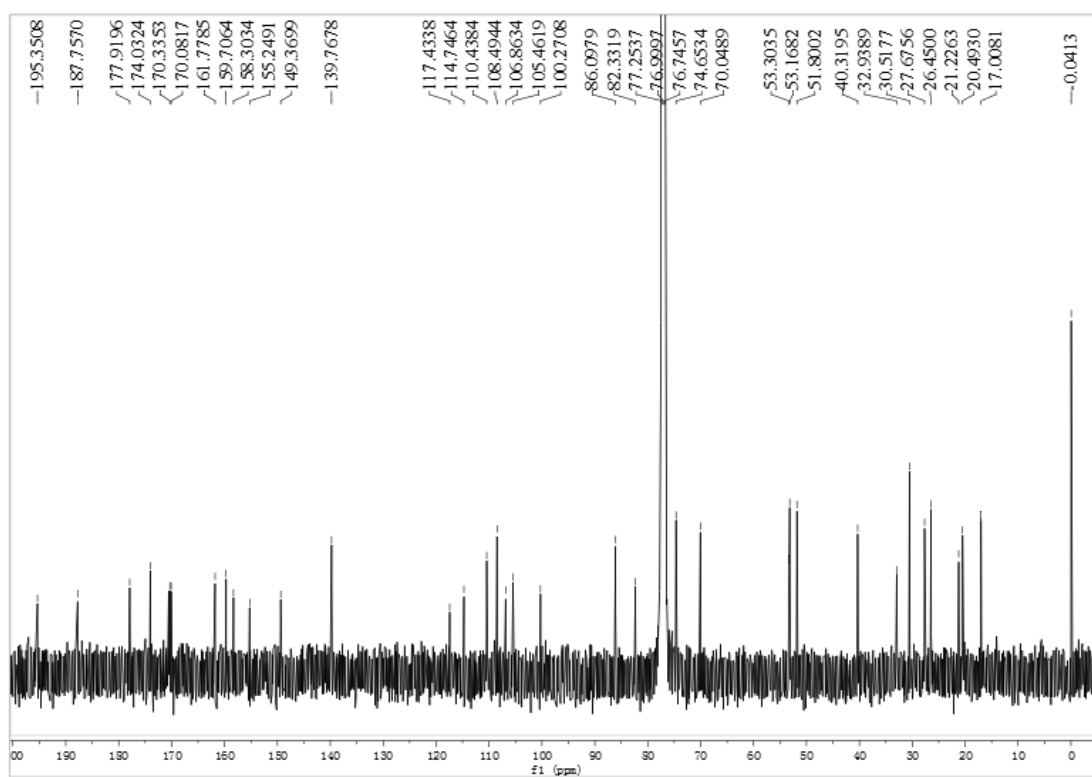

Figure S59.  $^{13}\text{C}$  NMR spectrum (125 MHz,  $\text{CDCl}_3$ ) of lentulin H (9)

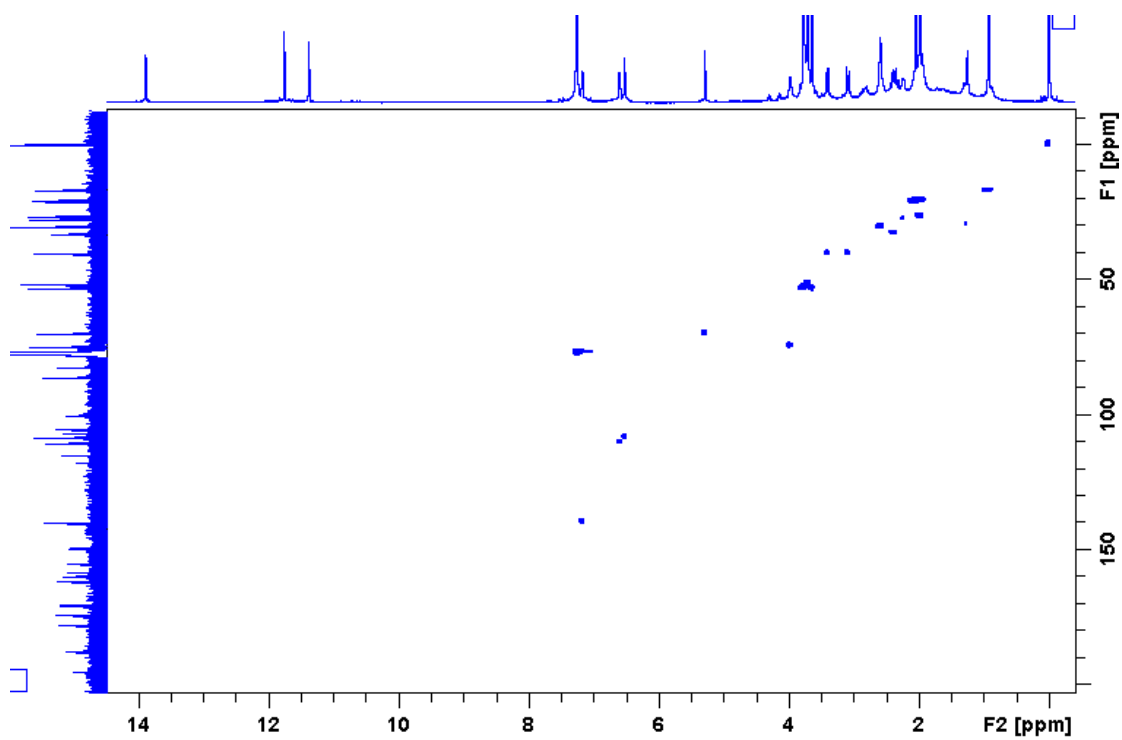

**Figure S60.** HSQC spectrum (CDCl<sub>3</sub>) of lentulin H (**9**)

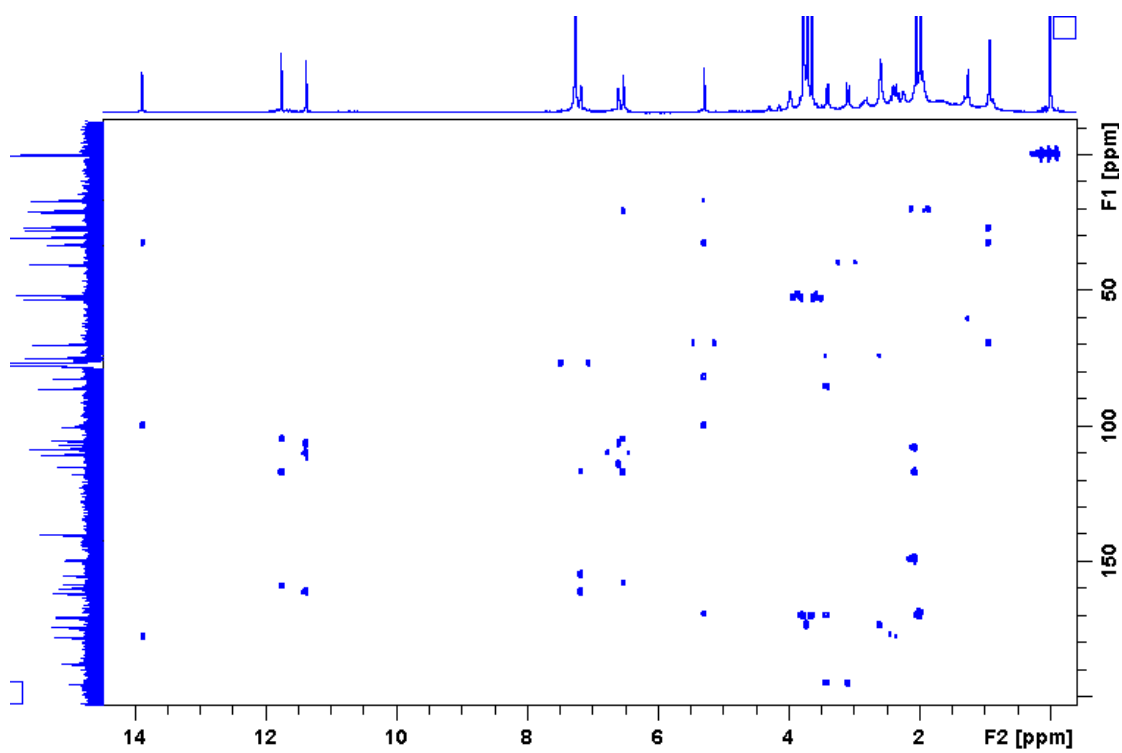

**Figure S61.** HMBC spectrum (CDCl<sub>3</sub>) of lentulin H (**9**)

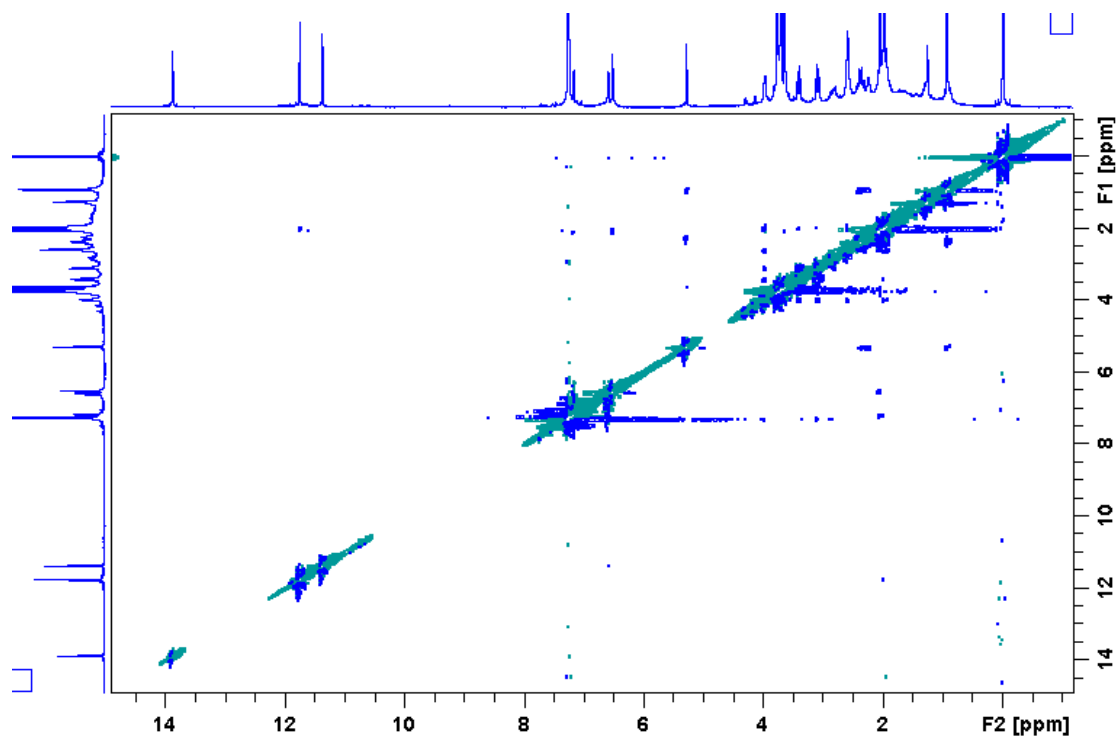

**Figure S62.** ROESY spectrum ( $\text{CDCl}_3$ ) of lentulin H (**9**)

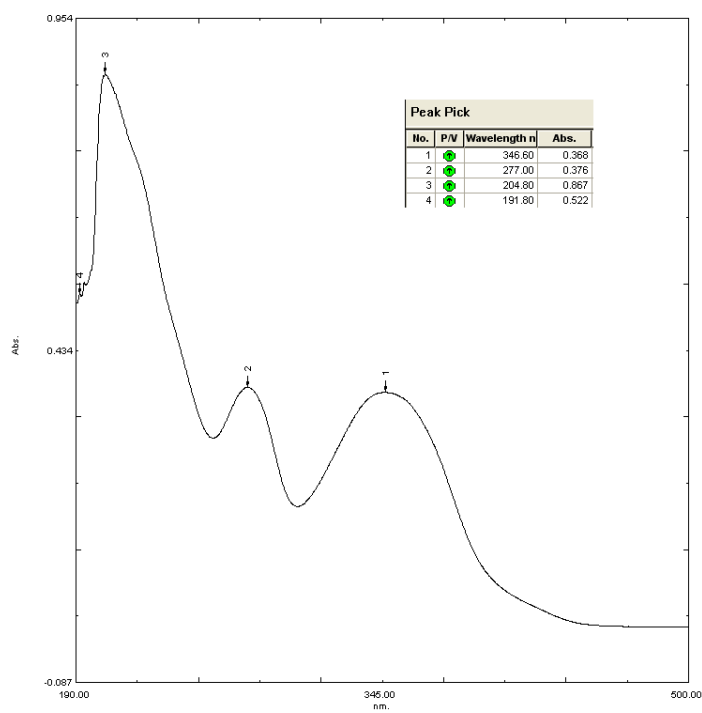

**Figure S63.** UV spectrum ( $\text{MeOH}$ ) of lentulin H (**9**)



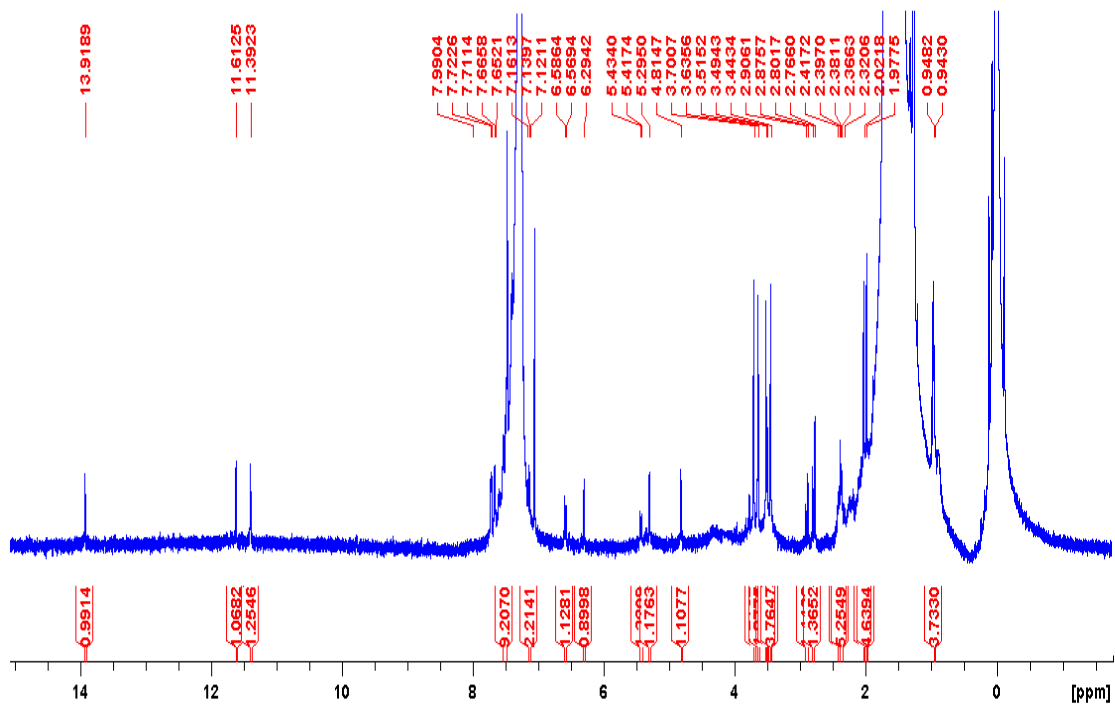

**Figure S64.**  $^1\text{H}$  NMR spectrum (500 MHz,  $\text{CDCl}_3$ ) of lentulin H  
(*R*)-MPA ester **9a**

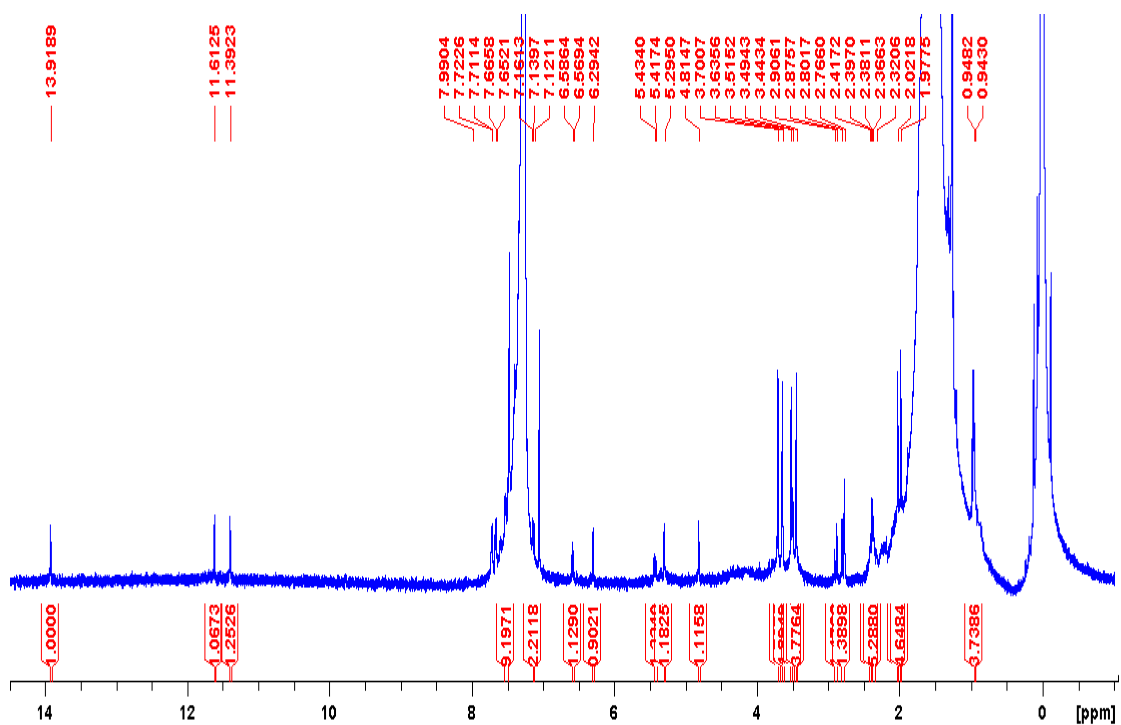

**Figure S65.**  $^1\text{H}$  NMR spectrum (500 MHz,  $\text{CDCl}_3$ ) of lentulin H (*S*)-MPA  
ester **9b**
